# Supplementary material
Source: ML conference proceedings conference paper supplement (https://openreview.net/forum?id=q1acmWAO9r)
Supplement: supplementary_material [file Uni_Instruct_NeurIPS_2025 (3).pdf › supp/Uni_Instruct_NeurIPS_2025 (3).pdf]

# Uni-Instruct: One-step Diffusion Model through Unified Diffusion Divergence Instruction

Anonymous Author(s)

Affiliation

Address

email

## Abstract

In this paper, we unify more than 10 existing one-step diffusion distillation approaches, such as Diff-Instruct, DMD, SIM, SiD,  $f$ -distill, etc, inside a theory-driven framework which we name the *Uni-Instruct*. Uni-Instruct is motivated by our proposed diffusion expansion theory of the  $f$ -divergence family. Then we introduce key theories that overcome the intractability issue of the original expanded  $f$ -divergence, resulting in an equivalent yet tractable loss that effectively trains one-step diffusion models by minimizing the expanded  $f$ -divergence family. The novel unification introduced by Uni-Instruct not only offers new theoretical contributions that help understand existing approaches from a high-level perspective but also leads to state-of-the-art one-step diffusion generation performances. On the CIFAR10 generation benchmark, Uni-Instruct achieves record-breaking Frechet Inception Distance (FID) values of **1.46** for unconditional generation and **1.38** for conditional generation. On the ImageNet-64  $\times$  64 generation benchmark, Uni-Instruct achieves a new SoTA one-step diffusion FID value of **1.06**, which outperforms its 79-step teacher diffusion with a significant improvement margin of 1.29 (1.06 vs 2.35). We also apply Uni-Instruct on broader tasks like text-to-3D generation. For text-to-3D generation, Uni-Instruct gives decent results, which slightly outperforms previous methods, such as SDS and VSD, in terms of both generation quality and diversity. Both the solid theoretical and empirical contributions of Uni-Instruct will potentially help future studies on one-step diffusion distillation and knowledge transferring of diffusion models.

## 1 Introduction

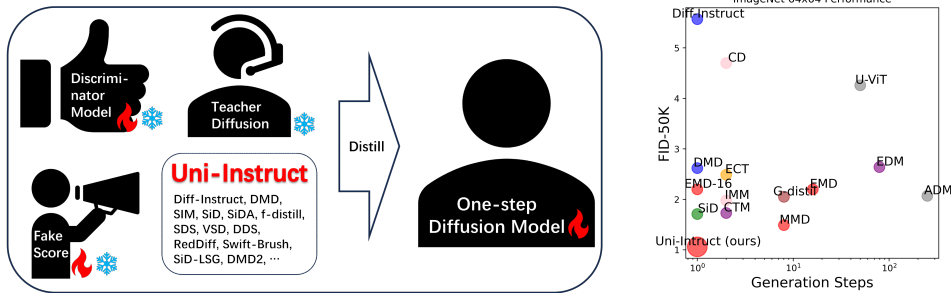

Figure 1: **Left:** Conception overview of *Uni-Instruct*. The *Uni-Instruct* unifies more than 10 existing diffusion distillation methods in a wide range of applications. Please check Table 6 for details. **Right:** selected FID scores of different models on ImageNet-64  $\times$  64 conditional generation benchmark.

One-step diffusion models, also known as one-step generators [31, 33], have been recognized as a stand-alone family of generative models that reach the leading generative performances in a wide range of applications, including benchmarking image generation [33, 34, 66, 73, 72, 18, 63], text-to-image generation [32, 35, 65, 66, 34, 71, 17], text-to-video generation [1, 67], image-editing [14], and numerous others [37, 44, 59].

Currently, the mainstream of training the one-step diffusion model is through proper distillation approaches that minimize divergences between distributions of the one-step model and some teacher diffusion models. For instance, Diff-Instruct[33] was probably the first work that introduced one-step diffusion models by minimizing the Kullback-Leibler divergence. DMD [66] improves the Diff-Instruct by introducing an additional regression loss. Score-identity Distillation (SiD) [73] studies the one-step diffusion distillation by minimizing the Fisher divergence, but without the proof of gradient equivalence of the loss function. Later, Score Implicit Matching (SIM)[34] introduced a complete proof of the gradient equivalence of losses that minimizes the general score-based divergence family, including the Fisher divergence as a special case.  $f$ -distill [63] and SiDA [72] recently generalized the Diff-Instruct and the SiD to the integral  $f$ -divergence and auxiliary GAN losses, resulting in performance improvements on image generation benchmarks. Other approaches have also elaborated on the one-step diffusion models on a wide range of applications through the lens of divergence minimization [17, 72, 71, 65, 32, 35, 18].

Provided that existing one-step diffusion models have achieved impressive performances, with some of them even outperforming their multi-step teacher diffusions, **existing training approaches seem conceptually separated into two lines:**

(1). Diff-Instruct[33], and its variants like DMD[66], tackle the Integral Kullback-Leibler Divergence, while  $f$ -distill[63] unifies the IKL as a special case of Integral  $f$ -divergence. **These KL and  $f$ -divergence based distillation approaches have the advantage of fast convergence, but suffer from mode-collapse issues and sub-optimal performances;**

(2). Score Implicit Matching (SIM[34]) proves a solid theoretical equivalence of score-based divergence minimization, which unifies the SiD[73] and Fisher divergences as special cases. **Though these general score-based divergences minimization has shown surprising generation performance, they may suffer from slow convergence issues and sub-optimal fidelity.**

Till now, it seems that the KL-based and Score-based divergence minimization approaches are pretty parallel in theory. Therefore, we are strongly motivated to answer an interesting yet important research question:

- **Can we unify KL-based and Score-based approaches in a unified theoretical framework? If we can, would the unified approach lead to better one-step diffusion models?**

In this paper, we provide a complete answer to the mentioned question. We successfully built a unified theoretical framework based on a novel diffusion expansion of the  $f$ -divergence family. Though the original expanded  $f$ -divergence family is not tractable to optimize, we introduced new theorems that lead to tractable yet equivalent losses, therefore making Uni-Instruct an executable training method.

In this way, we are able to unify more than 10 existing diffusion distillation methods across a wide range of applications via our proposed **Uni-Instruct**. The methods that have been unified by Uni-Instruct include both KL-divergence-based methods (such as Diff-Instruct[33], DMD[66], and  $f$ -distill[63]) and general score-divergence-based methods (such as Score Implicit Matching (SIM[34]), SiD[73], and SiDA[72]), as is shown in Table 6. Such a novel unification of existing one-step diffusion models marks the uniqueness of Uni-Instruct, which brings new perspectives in understanding and connecting different one-step diffusion models. **Besides the solid theoretical contributions, Uni-Instruct also leads to new State-of-the-art one-step image generation performances on competitive image generation benchmarks:** it achieved a record-breaking FID (Fréchet Inception Distance) [15] value of **1.06** on the ImageNet64  $\times$  64 conditional generation task. This score outperforms its 79-step teacher diffusion with a significant improvement margin of 1.29 (1.06 vs 2.35). Uni-Instruct also leads to new state-of-the-art FIDs of **1.46** on CIFAR10 unconditional generation task and **1.36** on CIFAR10 unconditional generation task, significantly outperforming previous one-step models such as  $f$ -distill, SiDA, SIM, SiD, DMD, and Diff-Instruct. It also outperforms competitive few-step generative models, including consistency models [12, 52, 28], moment matching distillation models [47], inductive models [70], and many others [61].

Besides the one-step generation benchmark, we are inspired by DreamFusion [44], ProlificDreamer [59], and Diff-Instruct [33]. In Section 5.3, we also successfully apply Uni-Instruct as a knowledge transferring approach for text-to-3D generation applications, resulting in robust, diverse, and high-fidelity 3D contents which are slightly better than ProlificDreamer in **quality** and **diversity**.

We summarize the theoretical and practical contributions in this paper as follows:

- **Unified Theoretical Framework:** We introduced a unified theoretical framework named Uni-Instruct together with a novel  $f$ -divergence expansion theorem. Uni-Instruct is able to unify more than 10 existing one-step diffusion distillation approaches, bringing new perspectives to understanding one-step diffusion models.
- **Tractable and Flexible Training Objective:** We introduce novel theoretical tools, such as gradient equivalence theorems, and derived tractable yet equivalent losses for Uni-Instruct. This leads to both flexible training objectives and new tools for one-step diffusion models.
- **New SoTA Practical Performances:** Uni-Instruct achieved new state-of-the-art generation performances (measured in FID) on CIFAR10 (a one-step FID of 1.36) and ImageNet64  $\times$  64 (a one-step FID of 1.06) benchmarks. We also successfully applied Uni-Instruct on the text-to-3D generation task, resulting in plausible and diverse 3D generation results.

## 2 Preliminary

### 2.1 One-step Diffusion Models

**Diffusion Models.** Assume we observe data from the underlying distribution  $q_d(\mathbf{x})$ . The goal of generative modeling is to train models to generate new samples  $\mathbf{x} \sim q_d(\mathbf{x})$ . The forward diffusion process of DM transforms any initial distribution  $q_0 = q_d$  towards some simple noise distribution,

$$d\mathbf{x}_t = \mathbf{F}(\mathbf{x}_t, t)dt + g(t)d\mathbf{w}_t, \quad (2.1)$$

where  $\mathbf{F}$  is a pre-defined drift function,  $g(t)$  is a pre-defined scalar-value diffusion coefficient, and  $\mathbf{w}_t$  denotes an independent Wiener process. A continuous-indexed score network  $\mathbf{s}_\varphi(\mathbf{x}, t)$  is employed to approximate marginal score functions of the forward diffusion process (2.1). The learning of score networks is achieved by minimizing a weighted denoising score matching objective [57, 54],

$$\mathcal{L}_{DSM}(\varphi) = \int_{t=0}^T \lambda(t) \mathbb{E}_{\mathbf{x}_0 \sim q_0, \mathbf{x}_t | \mathbf{x}_0 \sim q_t | q_0(\mathbf{x}_t | \mathbf{x}_0)} \|\mathbf{s}_\varphi(\mathbf{x}_t, t) - \nabla_{\mathbf{x}_t} \log q_t(\mathbf{x}_t | \mathbf{x}_0)\|_2^2 dt. \quad (2.2)$$

Here, the weighting function  $\lambda(t)$  controls the importance of the learning at different time levels, and  $q_t(\mathbf{x}_t | \mathbf{x}_0)$  denotes the conditional transition of the forward diffusion (2.1). After training, the score network  $\mathbf{s}_\varphi(\mathbf{x}_t, t) \approx \nabla_{\mathbf{x}_t} \log q_t(\mathbf{x}_t)$  is a good approximation of the marginal score function of the diffused data distribution. High-quality samples from a DM can be drawn by simulating SDE, which is implemented by the learned score network [54]. However, the simulation of an SDE is significantly slower than that of other models, such as one-step generator models.

### 2.2 One-step Diffusion Model via KL Divergence Minimization

**Notations and the Settings of One-step Diffusion Models.** We use the traditional settings introduced in Diff-Instruct [33] to present one-step diffusion models. Our basic setting is that we have a pre-trained diffusion model specified by the score function  $\mathbf{s}_{q_t}(\mathbf{x}_t) := \nabla_{\mathbf{x}_t} \log q_t(\mathbf{x}_t)$  where  $q_t(\mathbf{x}_t)$ 's are the underlying distribution diffused at time  $t$  according to (2.1). We assume that the pre-trained diffusion model provides a sufficiently good approximation of the data distribution, and thus will be the only item of consideration for our approach.

The one-step diffusion model of our interest is a single-step generator network  $g_\theta$ , which can transform an initial random noise  $\mathbf{z} \sim p_z$  to obtain a sample  $\mathbf{x} = g_\theta(\mathbf{z})$ ; this network is parameterized by network parameters  $\theta$ . Let  $p_{\theta,0}$  denote the data distribution of the student model, and  $p_{\theta,t}$  denote the marginal diffused data distribution of the student model with the same diffusion process (2.1). The student distribution implicitly induces a score function  $\mathbf{s}_{p_{\theta,t}}(\mathbf{x}_t) := \nabla_{\mathbf{x}_t} \log p_{\theta,t}(\mathbf{x}_t)$ , and evaluating it is generally performed by training an alternative score network as elaborated later.

121 **Diff-Instruct** Diff-Instruct [33] is the first work that trains one-step diffusion models by mini-  
 122 mizing the integral of KL divergence between the one-step model and the teacher diffusion model  
 123 distributions. The integral Kullback-Leibler divergence between one-step model  $p_\theta(\cdot)$  and teacher  
 124 diffusion model  $q_0(\cdot)$  is defined as:  $\mathcal{D}_{\text{IKL}}(p_\theta||q_0) := \int_{t=0}^T w(t) \mathbb{E}_{\substack{\mathbf{x}_0=g_\theta(\mathbf{z}), \mathbf{z} \sim \mathcal{N}(\mathbf{0}, \mathbf{I}) \\ \mathbf{x}_t|\mathbf{x}_0 \sim q_t|_0(\mathbf{x}_t|\mathbf{x}_0)}} \left\{ \log \frac{p_{\theta,t}(\mathbf{x}_t)}{q_t(\mathbf{x}_t)} \right\} dt$ .  
 125 Though IKL as a training objective is intractable because we do not have a direct dependence of  $\theta$   
 126 and  $p_{\theta,t}(\cdot)$ . [33] proved in theory that a tractable yet equivalent objective writes:

$$\mathcal{L}_{\text{DI}}(\theta) := \int_{t=0}^T w(t) \mathbb{E}_{\substack{\mathbf{x}_0=g_\theta(\mathbf{z}), \mathbf{z} \sim \mathcal{N}(\mathbf{0}, \mathbf{I}) \\ \mathbf{x}_t|\mathbf{x}_0 \sim q_t|_0(\mathbf{x}_t|\mathbf{x}_0)}} \text{SG} \left\{ \mathbf{s}_{p_{\text{SG}[\theta],t}}(\mathbf{x}_t) - \mathbf{s}_{q_t}(\mathbf{x}_t) \right\}^T \mathbf{x}_t(\theta) dt, \quad (2.3)$$

127 Where the operator  $\text{SG}(\cdot)$  in (2.3) represents the stop-gradient operator. Diff-Instruct proposed to use  
 128 an online-trained fake diffusion model to approximate the stopped-gradient one-step model score  
 129 function  $\mathbf{s}_{\psi,t}(\mathbf{x}_t) \approx \mathbf{s}_{p_{\text{SG}[\theta],t}}(\mathbf{x}_t)$ . Such a novel use of a fake score is kept by following approaches  
 130 such as DMD, SiD, etc. Two key contributions of Diff-Instruct are (1) first introducing the concept of  
 131 the one-step distillation via divergence minimization; (2) introducing a technical path that derives  
 132 tractable losses by proving gradient equality w.r.t the intractable divergence.

### 133 2.3 One-step Diffusion Model via Score-based Divergence Minimization

134 **Score Implicit Matching (SIM).** Inspired by Diff-Instruct and the empirical success of SiD [73],  
 135 recent work, the Score-implicit Matching (SIM) [34], has generalized the KL divergences to general  
 136 score-based divergence by proving new gradient equivalence theories. The general score-divergence  
 137 is defined via:  $\mathcal{D}^{[0,T]}(p, q) := \int_{t=0}^T w(t) \mathbb{E}_{\mathbf{x}_t \sim \pi_t} \left\{ \mathbf{d}(\mathbf{s}_{p_t}(\mathbf{x}_t) - \mathbf{s}_{q_t}(\mathbf{x}_t)) \right\} dt$ , where  $p_t$  and  $q_t$  denote  
 138 the marginal densities of the diffusion process (2.1) at time  $t$  initialized with  $q$  and  $p$  respectively.  
 139  $w(t)$  is an integral weighting function.  $\mathbf{d}(\cdot)$  is a distance function. Clearly, we have  $\mathcal{D}^{[0,T]}(p, q) = 0$   
 140 if and only if all marginal score functions agree, which implies that  $p_0(\mathbf{x}_t) = q_0(\mathbf{x}_t)$ , a.s.  $\pi_0$ .

141 SIM shows that Eq. (2.4) has the same parameter gradient as the intractable score-divergence:

$$\mathcal{L}_{\text{SIM}}(\theta) = \int_{t=0}^T w(t) \mathbb{E}_{\substack{\mathbf{z} \sim p_{\mathbf{z}}, \mathbf{x}_0=g_\theta(\mathbf{z}), \\ \mathbf{x}_t|\mathbf{x}_0 \sim q_t(\mathbf{x}_t|\mathbf{x}_0)}} \left\{ -\mathbf{d}'(\mathbf{y}_t) \right\}^T \left\{ \mathbf{s}_{p_{\text{sg}[\theta],t}}(\mathbf{x}_t) - \nabla_{\mathbf{x}_t} \log q_t(\mathbf{x}_t|\mathbf{x}_0) \right\} dt, \quad (2.4)$$

142 with  $\mathbf{y}_t := \mathbf{s}_{p_{\text{sg}[\theta],t}}(\mathbf{x}_t) - \mathbf{s}_{q_t}(\mathbf{x}_t)$ . Now the objective becomes tractable.

143 In Section 3, we use theoretical tools from Diff-Instruct and SIM to prove the gradient equivalence  
 144 of tractable Uni-Instruct loss and the intractable expanded  $f$ -divergence. Furthermore, we are  
 145 surprisingly to find that the resulting gradient expression recovers a novel combination of the Diff-  
 146 Instruct and the SIM parameter gradient.

### 147 2.4 Relation Between KL Divergence and Fisher Divergence

148 Inspired by the famous De Bruijn identity [64, 7] that describes entropy evolution along heat  
 149 diffusion, notable works [49, 40, 36, 53] have built the relationship between KL divergence and  
 150 Fisher divergence via a diffusion expansion: the KL divergence is the integral of the Fisher divergence  
 151 along a diffusion process under mild regularity conditions:

$$\mathcal{D}_{\text{KL}}(p_\theta||q_0) = \int_0^T \frac{1}{2} g^2(t) \mathbb{E}_{p_\theta} [\|\mathbf{s}_{p_t}(\mathbf{x}_t) - \mathbf{s}_{q_t}(\mathbf{x}_t)\|_2^2] dt \quad (2.5)$$

152 Motivated by the relationship between KL divergence and Fisher divergence, in Section 3, we  
 153 begin the Uni-Instruct framework by proposing a novel diffusion expansion theorem of general KL  
 154 divergence: the  $f$ -divergence family.

## 155 3 Uni-Instruct: Unify One-step Distillation Methods in Theory

156 In this section, we introduce Uni-Instruct, a theory-driven family of approaches for the one-step  
 157 distillation of score-based diffusion models. Uni-Instruct is able to unify more than 10 existing  
 158 methods as special cases with proper weighting functions. It also leads to new state-of-the-art  
 159 one-step generation performances on ImageNet64  $\times$  64 and CIFAR10 generation benchmarks.



Uni-Instruct is built upon a novel *diffusion expansion* theory of the  $f$ -divergence family. We begin by giving a brief introduction to the  $f$ -divergence family. We then prove a novel diffusion expansion theory of  $f$ -divergences in Section 3.1, which acts as the target objective we would like to optimize. Then in Section 3.2, we provide a non-trivial theorem that leads to an equivalent yet tractable loss function that shares the same parameter gradient as the intractable expanded  $f$ -divergence.

### 3.1 Diffusion Expansion of $f$ -Divergence

**$f$ -divergence.** For a convex function  $f(\cdot)$  on  $(0, +\infty)$ , where  $f(1) = 0$ , The  $f$ -divergence[45] is:

$$\mathcal{D}_f(q||p) = \int p(\mathbf{x}) f\left(\frac{q(\mathbf{x})}{p(\mathbf{x})}\right) d\mathbf{x}. \quad (3.1)$$

Appropriate choices of the function  $f(\cdot)$  lead to many widely-used divergences such as reverse-KL divergence (RKL), forward-KL divergence (FKL), Jeffrey-KL divergence (JKL), Jensen-Shannon divergence (JS), and Chi-Square divergence ( $\chi^2$ ). We put more introductions in the appendix B.

**The Diffusion Expansion Theorem.** We use the same notations and settings in Section 2.2.  $g_\theta(\cdot)$  represents the one-step diffusion model, and  $q_t(\cdot)$  represents the distributions of the teacher diffusion model. Our goal is to minimize the  $f$ -divergence between the output image distribution of the one-step model's distribution and the teacher diffusion model distribution  $\mathcal{D}_f(q_0||p_\theta)$ . However, since  $f$ -divergences are defined in the image data space, they can not directly incorporate instructions from multiple noise levels of teacher diffusion models. To address this issue, we first introduce a diffusion expansion Theorem 3.1 of  $f$ -divergence along a diffusion process. This expansion enables us to construct training objectives by considering all diffusion noise levels.

**Theorem 3.1** (Diffusion Expansion of  $f$ -Divergence). *Assume  $p, q$  are distributions that both evolve along Eq. 2.1. We have the following equivalence:*

$$\mathcal{D}_f(q_0||p_\theta) = \int_0^T \frac{1}{2} g^2(t) \mathbb{E}_{p_{\theta,t}} \left[ \left( \frac{q_t}{p_{\theta,t}} \right)^2 f''\left( \frac{q_t}{p_{\theta,t}} \right) \|s_{p_{\theta,t}}(\mathbf{x}_t) - s_{q_t}(\mathbf{x}_t)\|_2^2 \right] dt, \quad (3.2)$$

We give a complete proof with regularity analysis in Appendix A.1. This fundamental expansion (Eq. 3.2) expands the static  $f$ -divergence in data space into an integral of divergences along the diffusion process. **However, directly optimizing objective (3.2) is not tractable** because we do not know the exact expressions of either the density  $p_{\theta,t}$  or the score function  $s_{p_{\theta,t}}(\cdot)$  of the diffused one-step model's distribution. To step towards a tractable objective, we derive the  $\theta$  gradient of the expanded  $f$ -divergence (3.2) in Theorem 3.2.

### 3.2 Theories to Get Tractable Losses

To tackle the intractable issue of the expanded  $f$ -divergence, we prove a novel parameter gradient equivalence theorem 3.2.

**Theorem 3.2** (Gradient Equality Theorem of the Expanded  $f$ -divergence). *Let  $q_t(\mathbf{x})$  and  $p_{\theta,t}(\mathbf{x})$  be probability density functions evolving under the Fokker-Planck dynamics, and  $f : \mathbb{R}_+ \rightarrow \mathbb{R}$  is a four-times differentiable convex function. The parameter gradient of the  $f$ -divergence rate satisfies:*

$$\begin{aligned} & \frac{1}{2} g^2(t) \nabla_\theta \left\{ \mathbb{E}_{p_{\theta,t}} \left[ \left( \frac{q_t}{p_{\theta,t}} \right)^2 f''\left( \frac{q_t}{p_{\theta,t}} \right) \|s_{p_{\theta,t}}(\mathbf{x}_t) - s_{q_t}(\mathbf{x}_t)\|_2^2 \right] \right\} \\ &= -\frac{1}{2} g^2(t) \frac{\partial}{\partial \theta} \left\{ \mathbb{E}_{p_{\theta,t}} \left[ \text{SG} \left( c_1 \left( \frac{q_t}{p_{\theta,t}} \right) \right) \left( s_{q_t}(\mathbf{x}_t) - s_{p_{\text{sg}[\theta],t}}(\mathbf{x}_t) \right) \left( s_{p_{\text{sg}[\theta],t}}(\mathbf{x}_t) - \nabla_{\mathbf{x}_t} \log q_t(\mathbf{x}_t | \mathbf{x}_0) \right) \right] \right\} \\ & \quad - \frac{1}{2} g^2(t) \frac{\partial}{\partial \theta} \left\{ \mathbb{E}_{p_{\theta,t}} \left[ \text{SG} \left( c_2 \left( \frac{q_t}{p_{\theta,t}} \right) \right) \left( s_{q_t}(\mathbf{x}_t) - s_{p_{\theta,t}}(\mathbf{x}_t) \right) \|s_{q_t}(\mathbf{x}_t) - s_{p_{\theta,t}}(\mathbf{x}_t)\|_2^2 \right] \right\} \end{aligned} \quad (3.3)$$

where  $\text{SG}$  donates stop gradient operator, and the curvature coupling coefficient  $\mathcal{C}(r)$  are defined as:

$$\mathcal{C}_1(r) := r^3 f'''(r), \quad \mathcal{C}_2(r) := 2r^2 f''(r) + 4r^3 f'''(r) + r^4 f''''(r), \quad r := \frac{q_t(\mathbf{x})}{p_{\theta,t}(\mathbf{x})} \quad (3.4)$$

**Remark 3.3.** It is worth noting that in Theorem 3.2, we derived an equality of the gradient of the intractable expanded  $f$ -divergence. The right side of the equality is two terms, which are gradients of

two tractable functions. With this observation, we can see that minimizing the tractable right-hand side of equality (3.3) using gradient-based optimization algorithms such as Adam [23] is equivalent to minimizing the intractable expanded  $f$ -divergence, which lies in the left-hand side.

First, we notice that the gradient of the training objective admits a composition of the Diff-Instruct[33] gradient and a SIM[34] gradient. Therefore, we can formally write down our tractable loss function as:

$$\mathcal{L}_{UI}(\theta) = \int_0^T -\frac{1}{2}g^2(t) (\lambda_f^{\text{DI}} \mathcal{L}_{\text{DI}} + \lambda_f^{\text{SIM}} \mathcal{L}_{\text{SIM}}) dt, \quad (3.5)$$

$$\begin{aligned} \mathcal{L}_{\text{SIM}} &= \mathbb{E}_{p_{\theta,t}} [\text{SG}(\mathcal{C}_1(r)) (s_{q_t}(\mathbf{x}_t) - s_{p_{sg[\theta],t}}(\mathbf{x}_t)) (s_{p_{sg[\theta],t}}(\mathbf{x}_t) - \nabla_{\mathbf{x}_t} \log q_t(\mathbf{x}_t | \mathbf{x}_0))] , \\ \mathcal{L}_{\text{DI}} &= \mathbb{E}_{p_{\theta,t}} [\text{SG}(\mathcal{C}_2(r)) (s_{q_t}(\mathbf{x}_t) - s_{p_{\theta,t}}(\mathbf{x}_t)) \|s_{q_t}(\mathbf{x}_t) - s_{p_{\theta,t}}(\mathbf{x}_t)\|_2^2 x_t] , \end{aligned} \quad (3.6)$$

where the weighting coefficients are determined by the  $f$ -divergence selection, we provide our completed proofs in Appendix A.2.

**Density Ratio Estimated via an Auxiliary GAN Loss** Notice that the tractable loss function (3.5) requires the density ratio between the one-step model and teacher diffusion. For this, we train a GAN discriminator along the process, where the discriminator output serves as an estimator. This use of GAN discriminator is also wide applicable in other works like SiDA[72] and  $f$ -distill [63]. Details on why the GAN discriminator recovers the density ratio can be found in Theorem A.1.

**Practical Algorithm of the Uni-Instruct** We can now present the formal training algorithm of Uni-Instruct. As is shown in Algorithm 1, we maintain the active training status of three models: one-step diffusion model, online fake score network, and a discriminator. The training is performed in two steps alternatively: we first optimize the discriminator with real data, and then optimize the online fake score network with score matching loss. After that, we optimize the one with Uni-Instruct loss, which is given by the previous two models. Uni-Instruct loss varies based on the divergence we choose. We provide example divergences in Tab. 5. Note that through choosing proper divergence, we can recover the distillation loss of Diff-Instruct [33], SIM [34], as well as  $f$ -distill [63]. To be more specific:  $\mathcal{L}_{\text{SIM}}$  vanishes when selecting  $\chi^2$ -divergence, while  $\mathcal{L}_{\text{DI}}$  vanishes if we choose forward-KL, reverse-KL and Jeffrey-KL divergence.

### 3.3 How Uni-Instruct can Unify Previous Methods

In this section, we show in what cases Uni-Instruct can recover previous methods. As is shown in Tab. 6, Uni-Instruct can effectively unify more than 10 existing distillation methods for one-step diffusion models, such as Diff-Instruct, DMD,  $f$ -distill, SIM, and SiD.

**DI, DMD, and  $f$ -distill are Uni-Instruct with additional time weighting.** DI [33] and DMD [66] integrates KL divergence along a diffusion process:  $D_{\text{IKL}}(p_{\theta}||q_0) := \int_0^T w(t) D_{\text{KL}}(p_{\theta}||q_0) dt$ . Furthermore,  $f$ -distill [63] replace KL with general  $f$ -divergence. Our goal, on the other hand, is to match these two distributions only at the original distributions:  $D_f(q_0||p_{\theta})$ , which requires no specific weightings  $\omega(t)$ . Our framework is more theoretically self-consistent for those ad-hoc weightings that may induce mismatches between the optimization target and the true distribution divergence. However, with additional weightings, Uni-Instruct can recover  $f$ -distill.

**Corollary 3.4.** Suppose  $W(t) = \int w(t) dt + C$ ,  $W(0) = 0$ , the expression of Uni-Instruct with an extra weighting  $W(t)$  is equivalent to  $f$ -distill:

$$\int_0^T \frac{1}{2} g^2(t) W(t) \mathbb{E}_{p_{\theta,t}} \left[ \left( \frac{q_t}{p_{\theta,t}} \right)^2 f'' \left( \frac{q_t}{p_{\theta,t}} \right) \|s_{p_{\theta,t}}(\mathbf{x}_t) - s_{q_t}(\mathbf{x}_t)\|_2^2 \right] dt = \int_0^T w(t) \mathcal{D}_f(q_0||p_{\theta,t}) dt. \quad (3.7)$$

Complete proof is in Appendix A.4, which leverages integration by parts and Theorem 3.1.

**SIM is a Special Case of Uni-Instruct.** Suppose  $d(\cdot)$  is l2-norm, SIM in Section 2.3 becomes:  $\int \omega(t) \mathbb{E}_{p_{\theta,t}} [\|s_{p_{\theta,t}}(\mathbf{x}_t) - s_{q_t}(\mathbf{x}_t)\|_2^2] dt$ . It turns out that SIM is a special case of Uni-Instruct. We find that the right-hand side of Theorem 3.1 will degenerate to SIM through selecting the divergence as reverse-KL divergence:  $\mathcal{D}_{\text{KL}}(p_{\theta}||q_0) = \frac{1}{2} g^2(t) \int \mathbb{E}_{p_{\theta,t}} [\|s_{p_{\theta,t}}(\mathbf{x}_t) - s_{q_t}(\mathbf{x}_t)\|_2^2] dt$ . As a result,

236 SIM is secretly minimizing the KL divergence between the teacher model and the one step diffusion  
 237 model, which is a special case of our  $f$ -divergence. Beyond this specific configuration, Uni-Instruct  
 238 offers enhanced flexibility through its support for alternative divergence metrics, including FKL and  
 239 JKL, which enable improved mode coverage. This generalized formulation contributes to superior  
 240 empirical performance, achieving lower FID values.

### 241 3.4 Text-to-3D Generation using Uni-Instruct

242 Recent advances in 3D text-to-image synthesis leverage 2D diffusion models as priors. Dreamfusion  
 243 [44] introduced score distillation sampling (SDS) to align NeRFs with text guidance, while Prolific-  
 244 Dreamer [59] improved quality via variational score distillation (VSD). These methods mainly use  
 245 reverse KL divergence. Uni-Instruct generalizes this framework by allowing flexible divergence  
 246 choices (e.g., FKL, JKL), enhancing mode coverage and geometric fidelity, and unifying SDS and  
 247 VSD as special cases.

248 **Limitations of Uni-Instruct.** One of the major limitations of Uni-Instruct is that it needs an  
 249 additional discriminator for density ratio estimation, which may bring more computational costs.  
 250 Moreover, due to the complexity of the gradient formula, Uni-Instruct may result in bad performance  
 251 with an improper choice of  $f$ , as its complex gradient formula is not as straightforward as some  
 252 simpler existing methods like Diff-Instruct. We provide a detailed analysis in Appendix F.

## 253 4 Related Works

254 **Diffusion Distillation** Diffusion distillation [31] focuses on reducing generation costs by transfer-  
 255 ring knowledge from teacher diffusion models to more efficient student models. It primarily includes  
 256 three categories of methods: (1) *Trajectory Distillation*: These methods train student models to  
 257 approximate the generation trajectory of diffusion models using fewer denoising steps. Approaches  
 258 such as direct distillation [29, 11] and progressive distillation [46, 38] aim to predict cleaner data from  
 259 noisy inputs. Consistency-based methods [52, 21, 51, 26, 13] instead minimize a self-consistency  
 260 loss across intermediate steps. Most of these methods require access to real data samples for effective  
 261 training. (2) *Divergence Minimization (Distribution Matching)*: This line of work aims to align  
 262 the distribution of the student model with that of the teacher. Adversarial training-based methods  
 263 [60, 62] typically require real data to perform distribution matching. Alternatively, several approaches  
 264 minimize divergences like the KL divergence (e.g., Diff-Instruct [33, 66]) or Fisher divergence (e.g.,  
 265 Score Identity Distillation [73], Score Implicit Matching [34]), and often do so without requiring  
 266 real samples. Numerous improvements have been made to these two lines of work: DMD2 [65] and  
 267 SiDA [72] add real images during training, rapidly surpasses the teacher’s performance.  $f$ -distill  
 268 [63] generalize KL divergence of Diff-Instruct into  $f$ -divergence and compared the affection of  
 269 different divergences. (3) *Other Methods*: Several alternative techniques have been proposed, in-  
 270 cluding operator learning [68], ReFlow [27], and Flow Matching Models (FMM) [4]. Additionally,  
 271 significant progress has been made toward scaling diffusion distillation for ultra-fast or even one-step  
 272 text-to-image generation [30, 17, 55, 66, 71, 65].

## 273 5 Experiments

274 In this section, we first demonstrate Uni-Instruct’s strong capability to generate high-quality samples  
 275 on benchmark datasets through efficient distillation. Followed by text-to-3D generation, which  
 276 illustrates the wide application of Uni-Instruct.

### 277 5.1 Benchmark Datasets Generation

278 **Experiment Settings** We evaluate Uni-Instruct for both conditional and unconditional generations  
 279 on CIFAR10 [24] and conditional generations on ImageNet  $64 \times 64$  [9]. We use EDM [20] as teacher  
 280 models. In each experiment, we implement three types of divergences: Reverse-KL (RKL), Forward-  
 281 KL (FKL), and Jeffrey-KL (JKL) divergence. We borrow the parameters settings from SiDA [72],  
 282 which takes the output from the diffusion unet encoder directly as the discriminator. As for evaluation  
 283 metrics, we use FID, as it simultaneously quantifies both image quality and diversity.

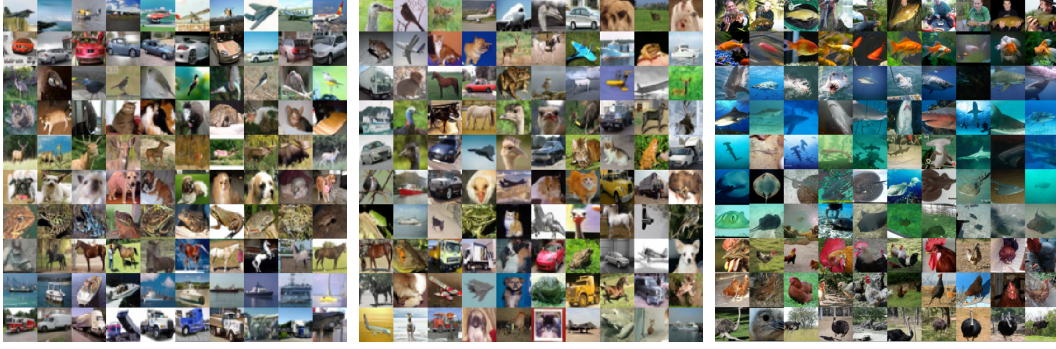

Figure 2: Generated samples from Uni-Instruct one-step generators that are distilled from pre-trained diffusion models on different datasets. *Left*: CIFAR10 (unconditional); *Mid*: CIFAR10 (conditional); *Right*: ImageNet  $64 \times 64$  (conditional)

**Performance Evaluations** Tab. 1, Tab. 3 and Tab. 2 shows Uni-Instruct performance on both settings of CIFAR10 and ImageNet  $64 \times 64$ . **Uni-Instruct achieves new state-of-the-art one-step generation performances on all datasets.** Our important findings include: (1) **When training from scratch, JKL achieves the lowest FID score.** On CIFAR10, JKL trained from scratch has a FID score of 1.42, out-perform other baseline methods like DMD [66], SiDA [72], and the teacher model EDM [20]. (2) **When resuming a trained SiD model (RKL), FKL achieves even better results.** As is shown in the Table 1, FKL with longer training achieves a new state-of-the-art one-step generation on both datasets. This means a two-time training schedule: first trained with RKL until convergence, followed by FKL, enhances the model’s performance with both mode-seeking behavior from RKL and mode-covering behavior from FKL.

Table 1: Comparison image generation on CIFAR-10 (unconditional). The best one/few-step generator under the FID metric is highlighted with **bold**.

| Family      | Model                                       | NFE  | FID ( $\downarrow$ ) |
|-------------|---------------------------------------------|------|----------------------|
| Teacher     | VP-EDM [20]                                 | 35   | 1.97                 |
| Diffusion   | DPM-Solver-3 [69]                           | 48   | 2.65                 |
|             | DDIM [50]                                   | 100  | 4.16                 |
|             | DDPM [16]                                   | 1000 | 3.17                 |
|             | NCSN++ [54]                                 | 1000 | 2.38                 |
|             | VDM [22]                                    | 1000 | 4.00                 |
|             | iDDPM [41]                                  | 4000 | 2.90                 |
| Flow        | Rectified Flow [27]                         | 127  | 2.58                 |
|             | Flow Matching [25]                          | 142  | 6.35                 |
| Consistency | sCT [28]                                    | 2    | 2.06                 |
|             | ECT [12]                                    | 2    | 2.11                 |
|             | iCT [51]                                    | 2    | 2.46                 |
| Few Step    | PD [46]                                     | 2    | 4.51                 |
|             | IMM [70]                                    | 2    | 1.98                 |
|             | TRACT [3]                                   | 2    | 3.32                 |
|             | KD [29]                                     | 1    | 9.36                 |
|             | Diff. ProjGAN [58]                          | 1    | 2.54                 |
|             | PID [56]                                    | 1    | 3.92                 |
|             | DFNO [68]                                   | 1    | 3.78                 |
|             | iCT-deep [51]                               | 1    | 2.51                 |
|             | Diff-Instruct [33]                          | 1    | 4.53                 |
|             | DMD [66]                                    | 1    | 3.77                 |
|             | CTM [21]                                    | 1    | 1.98                 |
|             | SiD [73]                                    | 1    | 1.92                 |
|             | SiDA [72]                                   | 1    | 1.52                 |
|             | SiD <sup>2</sup> A [72]                     | 1    | 1.50                 |
|             | <b>Uni-Instruct + RKL (from scratch)</b>    | 1    | 1.52                 |
|             | <b>Uni-Instruct + FKL (from scratch)</b>    | 1    | 1.52                 |
|             | <b>Uni-Instruct + FKL (longer training)</b> | 1    | 1.48                 |
|             | <b>Uni-Instruct + JKL (from scratch)</b>    | 1    | <b>1.46</b>          |

Table 2: Class conditional ImageNet  $64 \times 64$  generation results. “Direct generation” and “Distillation” methods require one NFE, while the teacher uses 35 NFE.

| Family      | Model                                    | NFE  | FID ( $\downarrow$ ) |
|-------------|------------------------------------------|------|----------------------|
| Teacher     | VP-EDM [20]                              | 511  | 1.36                 |
| Diffusion   | RIN [19]                                 | 1000 | 1.23                 |
|             | DDPM [16]                                | 250  | 11.00                |
|             | ADM [10]                                 | 250  | 2.07                 |
|             | DiT-L/2 [43]                             | 250  | 2.91                 |
|             | DPM-Solver-3 [69]                        | 50   | 17.52                |
|             | U-ViT [2]                                | 50   | 4.26                 |
| GAN         | BigGAN-deep [5]                          | 1    | 4.06                 |
|             | StyleGAN-XL [48]                         | 1    | 1.52                 |
| Consistency | iCT [51]                                 | 1    | 4.02                 |
|             | iCT-deep [51]                            | 1    | 3.25                 |
|             | ECT [12]                                 | 1    | 2.49                 |
| Few Step    | G-istill [38]                            | 8    | 2.05                 |
|             | PD [46]                                  | 2    | 8.95                 |
|             | Diff-Instruct [33]                       | 1    | 5.57                 |
|             | PID [56]                                 | 1    | 9.49                 |
|             | iCT-deep [51]                            | 1    | 3.25                 |
|             | EMD-16 [61]                              | 1    | 2.20                 |
|             | DFNO [68]                                | 1    | 7.83                 |
|             | DMD [66]                                 | 1    | 2.62                 |
|             | DMD2+longer training [65]                | 1    | 1.28                 |
|             | CTM [21]                                 | 1    | 1.92                 |
|             | SiD [73]                                 | 1    | 1.71                 |
|             | SiDA [72]                                | 1    | 1.35                 |
|             | SiD <sup>2</sup> A [72]                  | 1    | 1.10                 |
|             | <i>f</i> -distill [63]                   | 1    | 1.16                 |
|             | <b>Uni-Instruct+RKL(from scratch)</b>    | 1    | 1.35                 |
|             | <b>Uni-Instruct+JKL(from scratch)</b>    | 1    | 1.28                 |
|             | <b>Uni-Instruct+FKL(from scratch)</b>    | 1    | 1.34                 |
|             | <b>Uni-Instruct+FKL(longer training)</b> | 1    | <b>1.06</b>          |

## 5.2 Ablation Studies

**Performance Between Different Divergences and the effect of GAN loss.** We perform an ablation study on the techniques applied in our experiments. Table 4 ablates different components of our proposed method on CIFAR10, where we use an unconditional generator for all settings. For different divergences, we select three types: JKL, FKL, and RKL are divergences that only contains Grad(SiD),  $\chi^2$  divergence’s gradient is only contributed by Grad(DI), Jensen-Shannon (JS) divergence has a gradient that contains both:  $h_{DI}(\mathbf{x})\text{Grad}(\text{DI}) + h_{SiD}(\mathbf{x})\text{Grad}(\text{SiD})$ . Our result shows that JKL achieves the lowest FID value. Due to numerical instability of the weightings, JS yields unsuccessful distillation results. As for the effect of GAN loss, we find that removing it still yields a decent result. Our integrated approach also surpasses the performance of using Uni-Instruct loss alone(without adding GAN loss), highlighting the effectiveness of combining expanded  $f$ -divergence with GAN losses. We also find that using a model trained with RKL Uni-Instruct (which recovers the SiD[73] loss) as the initialization leads to better performances for all divergences.

Table 3: Label-conditioned image generation results on CIFAR-10. The best one/few-step generator under the FID metric is highlighted with **bold**.

| Family    | Model                                | NFE  | FID ( $\downarrow$ ) |
|-----------|--------------------------------------|------|----------------------|
| Teacher   | VP-EDM [20]                          | 35   | 1.79                 |
| Diffusion | DDPM [16]                            | 1000 | 3.17                 |
|           | iDDPM [41]                           | 4000 | 2.90                 |
| One Step  | Diff-Instruct [33]                   | 1    | 4.19                 |
|           | SIM [34]                             | 1    | 1.96                 |
|           | CTM [21]                             | 1    | 1.73                 |
|           | SiD [73]                             | 1    | 1.71                 |
|           | SiDA [72]                            | 1    | 1.44                 |
|           | SiD <sup>2</sup> A [72]              | 1    | 1.40                 |
|           | $f$ -distill [63]                    | 1    | 1.92                 |
|           | Uni-Instruct + RKL (from scratch)    | 1    | 1.44                 |
|           | Uni-Instruct + JKL (from scratch)    | 1    | 1.42                 |
|           | Uni-Instruct + FKL (from scratch)    | 1    | 1.43                 |
|           | Uni-Instruct + FKL (longer training) | 1    | <b>1.38</b>          |

Table 4: Ablation study on the performance of different divergences, the affection of GAN loss, as well as the initial model.

| Div.     | SiD Init. | GAN | FID $\downarrow$ |
|----------|-----------|-----|------------------|
| None     |           | ✓   | 8.21             |
| $\chi^2$ |           | ✓   | 4.37             |
| JS       |           | ✓   | 5.23             |
| JKL      |           | ✓   | <b>1.46</b>      |
| RKL      |           |     | 1.92             |
| FKL      |           |     | 1.88             |
| RKL      |           | ✓   | 1.52             |
| FKL      |           | ✓   | 1.52             |
| RKL      | ✓         | ✓   | 1.50             |
| FKL      | ✓         | ✓   | 1.48             |
| JKL      | ✓         | ✓   | 1.50             |

## 5.3 Text-to-3D Generation Using 2D Diffusion

In this subsection, we apply Uni-Instruct on text-to-3D generation. We re-implement the code base of ProlificDreamer [59] by adding an extra discriminator head to the output of the stable diffusion Unet’s encoder. We use FKL to distill the model for 400 epochs. Fig. 3 demonstrates the visual results from our 3D experiments. Uni-Instruct archives surprisingly decent 3D generation performances, with improved diversity and fidelity. Due to page limitations, we put detailed experiment settings and quantitative metrics in the Appendix E.

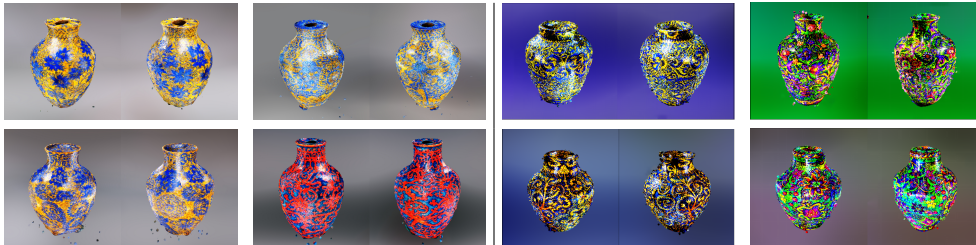

Figure 3: **Prompt:** A refined vase with artistic patterns. *Left:* ProlificDreamer; *Right:* UI+forward KL. Our vase demonstrate more diverse shapes as well as realistic patterns.

## 6 Conclusions

We present Uni-Instruct, a theoretically grounded framework for training one-step diffusion models via distribution matching. Through building upon a novel *diffusion expansion* theory of the  $f$ -divergence, Uni-Instruct establishes a unifying theoretical foundation that generalizes and connects more than 10 existing diffusion distillation methodologies. Uni-Instruct also demonstrates superior performance on benchmark datasets and efficacy in downstream tasks like text-to-3D generation. We hope Uni-Instruct offers useful insights for future studies on efficient generative models.



## References

- [1] Sherwin Bahmani, Ivan Skorokhodov, Victor Rong, Gordon Wetzstein, Leonidas Guibas, Peter Wonka, Sergey Tulyakov, Jeong Joon Park, Andrea Tagliasacchi, and David B Lindell. 4d-fy: Text-to-4d generation using hybrid score distillation sampling. In *Proceedings of the IEEE/CVF Conference on Computer Vision and Pattern Recognition*, pages 7996–8006, 2024.
- [2] Fan Bao, Shen Nie, Kaiwen Xue, Yue Cao, Chongxuan Li, Hang Su, and Jun Zhu. All are worth words: A vit backbone for diffusion models. In *Proceedings of the IEEE/CVF conference on computer vision and pattern recognition*, pages 22669–22679, 2023.
- [3] David Berthelot, Arnaud Autef, Jierui Lin, Dian Ang Yap, Shuangfei Zhai, Siyuan Hu, Daniel Zheng, Walter Talbott, and Eric Gu. Tract: Denoising diffusion models with transitive closure time-distillation. *arXiv preprint arXiv:2303.04248*, 2023.
- [4] Nicholas M Boffi, Michael S Albergo, and Eric Vanden-Eijnden. Flow map matching. *arXiv preprint arXiv:2406.07507*, 2024.
- [5] Andrew Brock, Jeff Donahue, and Karen Simonyan. Large scale gan training for high fidelity natural image synthesis. *arXiv preprint arXiv:1809.11096*, 2018.
- [6] Rui Chen, Yongwei Chen, Ningxin Jiao, and Kui Jia. Fantasia3d: Disentangling geometry and appearance for high-quality text-to-3d content creation. In *Proceedings of the IEEE/CVF international conference on computer vision*, pages 22246–22256, 2023.
- [7] Michael CH Choi, Chihoon Lee, and Jian Song. Entropy flow and de bruijn’s identity for a class of stochastic differential equations driven by fractional brownian motion. *Probability in the Engineering and Informational Sciences*, 35(3):369–380, 2021.
- [8] Paul F Christiano, Jan Leike, Tom Brown, Miljan Martic, Shane Legg, and Dario Amodei. Deep reinforcement learning from human preferences. *Advances in neural information processing systems*, 30, 2017.
- [9] Jia Deng, Wei Dong, Richard Socher, Li-Jia Li, Kai Li, and Li Fei-Fei. Imagenet: A large-scale hierarchical image database. In *2009 IEEE conference on computer vision and pattern recognition*, pages 248–255. Ieee, 2009.
- [10] Prafulla Dhariwal and Alexander Nichol. Diffusion models beat gans on image synthesis. *Advances in neural information processing systems*, 34:8780–8794, 2021.
- [11] Zhengyang Geng, Ashwini Pokle, and J Zico Kolter. One-step diffusion distillation via deep equilibrium models. *Advances in Neural Information Processing Systems*, 36:41914–41931, 2023.
- [12] Zhengyang Geng, Ashwini Pokle, William Luo, Justin Lin, and J Zico Kolter. Consistency models made easy. *arXiv preprint arXiv:2406.14548*, 2024.
- [13] Jiatao Gu, Shuangfei Zhai, Yizhe Zhang, Lingjie Liu, and Joshua M Susskind. Boot: Data-free distillation of denoising diffusion models with bootstrapping. In *ICML 2023 Workshop on Structured Probabilistic Inference & Generative Modeling*, 2023.
- [14] Amir Hertz, Kfir Aberman, and Daniel Cohen-Or. Delta denoising score. In *Proceedings of the IEEE/CVF International Conference on Computer Vision*, pages 2328–2337, 2023.
- [15] Martin Heusel, Hubert Ramsauer, Thomas Unterthiner, Bernhard Nessler, and Sepp Hochreiter. Gans trained by a two time-scale update rule converge to a local nash equilibrium. *Advances in neural information processing systems*, 30, 2017.
- [16] Jonathan Ho, Ajay Jain, and Pieter Abbeel. Denoising diffusion probabilistic models. *Advances in neural information processing systems*, 33:6840–6851, 2020.
- [17] Thuan Hoang Nguyen and Anh Tran. Swiftbrush: One-step text-to-image diffusion model with variational score distillation. *arXiv e-prints*, pages arXiv–2312, 2023.



- [18] Zemin Huang, Zhengyang Geng, Weijian Luo, and Guo-jun Qi. Flow generator matching. *arXiv preprint arXiv:2410.19310*, 2024.
- [19] Allan Jabri, David Fleet, and Ting Chen. Scalable adaptive computation for iterative generation. *arXiv preprint arXiv:2212.11972*, 2022.
- [20] Tero Karras, Miika Aittala, Timo Aila, and Samuli Laine. Elucidating the design space of diffusion-based generative models. *Advances in neural information processing systems*, 35:26565–26577, 2022.
- [21] Dongjun Kim, Chieh-Hsin Lai, Wei-Hsiang Liao, Naoki Murata, Yuhta Takida, Toshimitsu Uesaka, Yutong He, Yuki Mitsufuji, and Stefano Ermon. Consistency trajectory models: Learning probability flow ode trajectory of diffusion. *arXiv preprint arXiv:2310.02279*, 2023.
- [22] Diederik Kingma, Tim Salimans, Ben Poole, and Jonathan Ho. Variational diffusion models. *Advances in neural information processing systems*, 34:21696–21707, 2021.
- [23] Diederik P Kingma. Adam: A method for stochastic optimization. *arXiv preprint arXiv:1412.6980*, 2014.
- [24] Alex Krizhevsky, Geoffrey Hinton, et al. Learning multiple layers of features from tiny images. 2009.
- [25] Yaron Lipman, Ricky TQ Chen, Heli Ben-Hamu, Maximilian Nickel, and Matt Le. Flow matching for generative modeling. *arXiv preprint arXiv:2210.02747*, 2022.
- [26] Hongjian Liu, Qingsong Xie, Tianxiang Ye, Zhijie Deng, Chen Chen, Shixiang Tang, Xueyang Fu, Haonan Lu, and Zheng-Jun Zha. Scott: Accelerating diffusion models with stochastic consistency distillation. In *Proceedings of the AAAI Conference on Artificial Intelligence*, volume 39, pages 5451–5459, 2025.
- [27] Xingchao Liu, Chengyue Gong, and Qiang Liu. Flow straight and fast: Learning to generate and transfer data with rectified flow. *arXiv preprint arXiv:2209.03003*, 2022.
- [28] Cheng Lu and Yang Song. Simplifying, stabilizing and scaling continuous-time consistency models. *arXiv preprint arXiv:2410.11081*, 2024.
- [29] Eric Luhman and Troy Luhman. Knowledge distillation in iterative generative models for improved sampling speed. *arXiv preprint arXiv:2101.02388*, 2021.
- [30] Simian Luo, Yiqin Tan, Longbo Huang, Jian Li, and Hang Zhao. Latent consistency models: Synthesizing high-resolution images with few-step inference. *arXiv preprint arXiv:2310.04378*, 2023.
- [31] Weijian Luo. A comprehensive survey on knowledge distillation of diffusion models. *arXiv preprint arXiv:2304.04262*, 2023.
- [32] Weijian Luo. Diff-instruct++: Training one-step text-to-image generator model to align with human preferences. *arXiv preprint arXiv:2410.18881*, 2024.
- [33] Weijian Luo, Tianyang Hu, Shifeng Zhang, Jiacheng Sun, Zhenguo Li, and Zhihua Zhang. Diff-instruct: A universal approach for transferring knowledge from pre-trained diffusion models. *Advances in Neural Information Processing Systems*, 36:76525–76546, 2023.
- [34] Weijian Luo, Zemin Huang, Zhengyang Geng, J Zico Kolter, and Guo-jun Qi. One-step diffusion distillation through score implicit matching. *Advances in Neural Information Processing Systems*, 37:115377–115408, 2025.
- [35] Weijian Luo, Colin Zhang, Debing Zhang, and Zhengyang Geng. Diff-instruct\*: Towards human-preferred one-step text-to-image generative models. *arXiv preprint arXiv:2410.20898*, 2024.
- [36] Siwei Lyu. Interpretation and generalization of score matching. *arXiv preprint arXiv:1205.2629*, 2012.

- [37] Morteza Mardani, Jiaming Song, Jan Kautz, and Arash Vahdat. A variational perspective on solving inverse problems with diffusion models. *arXiv preprint arXiv:2305.04391*, 2023.
- [38] Chenlin Meng, Robin Rombach, Ruiqi Gao, Diederik Kingma, Stefano Ermon, Jonathan Ho, and Tim Salimans. On distillation of guided diffusion models. In *Proceedings of the IEEE/CVF Conference on Computer Vision and Pattern Recognition*, pages 14297–14306, 2023.
- [39] Ben Mildenhall, Pratul P Srinivasan, Matthew Tancik, Jonathan T Barron, Ravi Ramamoorthi, and Ren Ng. Nerf: Representing scenes as neural radiance fields for view synthesis. *Communications of the ACM*, 65(1):99–106, 2021.
- [40] Javier R Movellan and James L McClelland. Learning continuous probability distributions with symmetric diffusion networks. *Cognitive Science*, 17(4):463–496, 1993.
- [41] Alexander Quinn Nichol and Prafulla Dhariwal. Improved denoising diffusion probabilistic models. In *International conference on machine learning*, pages 8162–8171. PMLR, 2021.
- [42] Long Ouyang, Jeffrey Wu, Xu Jiang, Diogo Almeida, Carroll Wainwright, Pamela Mishkin, Chong Zhang, Sandhini Agarwal, Katarina Slama, Alex Ray, et al. Training language models to follow instructions with human feedback. *Advances in neural information processing systems*, 35:27730–27744, 2022.
- [43] William Peebles and Saining Xie. Scalable diffusion models with transformers. In *Proceedings of the IEEE/CVF international conference on computer vision*, pages 4195–4205, 2023.
- [44] Ben Poole, Ajay Jain, Jonathan T Barron, and Ben Mildenhall. Dreamfusion: Text-to-3d using 2d diffusion. *arXiv preprint arXiv:2209.14988*, 2022.
- [45] Alfréd Rényi. On measures of entropy and information. In *Proceedings of the fourth Berkeley symposium on mathematical statistics and probability, volume 1: contributions to the theory of statistics*, volume 4, pages 547–562. University of California Press, 1961.
- [46] Tim Salimans and Jonathan Ho. Progressive distillation for fast sampling of diffusion models. *arXiv preprint arXiv:2202.00512*, 2022.
- [47] Tim Salimans, Thomas Mensink, Jonathan Heek, and Emiel Hoogeboom. Multistep distillation of diffusion models via moment matching. *Advances in Neural Information Processing Systems*, 37:36046–36070, 2024.
- [48] Axel Sauer, Katja Schwarz, and Andreas Geiger. Stylegan-xl: Scaling stylegan to large diverse datasets. In *ACM SIGGRAPH 2022 conference proceedings*, pages 1–10, 2022.
- [49] Jascha Sohl-Dickstein, Peter Battaglini, and Michael R DeWeese. Minimum probability flow learning. *arXiv preprint arXiv:0906.4779*, 2009.
- [50] Jiaming Song, Chenlin Meng, and Stefano Ermon. Denoising diffusion implicit models. *arXiv preprint arXiv:2010.02502*, 2020.
- [51] Yang Song and Prafulla Dhariwal. Improved techniques for training consistency models. *arXiv preprint arXiv:2310.14189*, 2023.
- [52] Yang Song, Prafulla Dhariwal, Mark Chen, and Ilya Sutskever. Consistency models. 2023.
- [53] Yang Song, Conor Durkan, Iain Murray, and Stefano Ermon. Maximum likelihood training of score-based diffusion models. *Advances in neural information processing systems*, 34:1415–1428, 2021.
- [54] Yang Song, Jascha Sohl-Dickstein, Diederik P Kingma, Abhishek Kumar, Stefano Ermon, and Ben Poole. Score-based generative modeling through stochastic differential equations. *arXiv preprint arXiv:2011.13456*, 2020.
- [55] Yuda Song, Zehao Sun, and Xuanwu Yin. Sdxs: Real-time one-step latent diffusion models with image conditions. *arXiv preprint arXiv:2403.16627*, 2024.

- [56] Joshua Tian Jin Tee, Kang Zhang, Hee Suk Yoon, Dhananjaya Nagaraja Gowda, Chanwoo Kim, and Chang D Yoo. Physics informed distillation for diffusion models. *arXiv preprint arXiv:2411.08378*, 2024.
- [57] Pascal Vincent. A connection between score matching and denoising autoencoders. *Neural computation*, 23(7):1661–1674, 2011.
- [58] Zhendong Wang, Huangjie Zheng, Pengcheng He, Weizhu Chen, and Mingyuan Zhou. Diffusion-gan: Training gans with diffusion. *arXiv preprint arXiv:2206.02262*, 2022.
- [59] Zhengyi Wang, Cheng Lu, Yikai Wang, Fan Bao, Chongxuan Li, Hang Su, and Jun Zhu. Prolificdreamer: High-fidelity and diverse text-to-3d generation with variational score distillation. *Advances in Neural Information Processing Systems*, 36:8406–8441, 2023.
- [60] Zhisheng Xiao, Karsten Kreis, and Arash Vahdat. Tackling the generative learning trilemma with denoising diffusion gans. *arXiv preprint arXiv:2112.07804*, 2021.
- [61] Sirui Xie, Zhisheng Xiao, Diederik Kingma, Tingbo Hou, Ying Nian Wu, Kevin P Murphy, Tim Salimans, Ben Poole, and Ruiqi Gao. Em distillation for one-step diffusion models. *Advances in Neural Information Processing Systems*, 37:45073–45104, 2024.
- [62] Yanwu Xu, Yang Zhao, Zhisheng Xiao, and Tingbo Hou. Ufogen: You forward once large scale text-to-image generation via diffusion gans. In *Proceedings of the IEEE/CVF Conference on Computer Vision and Pattern Recognition*, pages 8196–8206, 2024.
- [63] Yilun Xu, Weili Nie, and Arash Vahdat. One-step diffusion models with  $f$ -divergence distribution matching. *arXiv preprint arXiv:2502.15681*, 2025.
- [64] Takuya Yamano. de bruijn-type identity for systems with flux. *The European Physical Journal B*, 86:1–6, 2013.
- [65] Tianwei Yin, Michaël Gharbi, Taesung Park, Richard Zhang, Eli Shechtman, Fredo Durand, and Bill Freeman. Improved distribution matching distillation for fast image synthesis. *Advances in Neural Information Processing Systems*, 37:47455–47487, 2024.
- [66] Tianwei Yin, Michaël Gharbi, Richard Zhang, Eli Shechtman, Fredo Durand, William T Freeman, and Taesung Park. One-step diffusion with distribution matching distillation. In *Proceedings of the IEEE/CVF conference on computer vision and pattern recognition*, pages 6613–6623, 2024.
- [67] Tianwei Yin, Qiang Zhang, Richard Zhang, William T Freeman, Fredo Durand, Eli Shechtman, and Xun Huang. From slow bidirectional to fast autoregressive video diffusion models. *arXiv preprint arXiv:2412.07772*, 2, 2024.
- [68] Hongkai Zheng, Weili Nie, Arash Vahdat, Kamyar Aizzadenesheli, and Anima Anandkumar. Fast sampling of diffusion models via operator learning. In *International conference on machine learning*, pages 42390–42402. PMLR, 2023.
- [69] Kaiwen Zheng, Cheng Lu, Jianfei Chen, and Jun Zhu. Dpm-solver-v3: Improved diffusion ode solver with empirical model statistics. *Advances in Neural Information Processing Systems*, 36:55502–55542, 2023.
- [70] Linqi Zhou, Stefano Ermon, and Jiaming Song. Inductive moment matching. *arXiv preprint arXiv:2503.07565*, 2025.
- [71] Mingyuan Zhou, Zhendong Wang, Huangjie Zheng, and Hai Huang. Long and short guidance in score identity distillation for one-step text-to-image generation. *arXiv preprint arXiv:2406.01561*, 2024.
- [72] Mingyuan Zhou, Huangjie Zheng, Yi Gu, Zhendong Wang, and Hai Huang. Adversarial score identity distillation: Rapidly surpassing the teacher in one step. *arXiv preprint arXiv:2410.14919*, 2024.
- [73] Mingyuan Zhou, Huangjie Zheng, Zhendong Wang, Mingzhang Yin, and Hai Huang. Score identity distillation: Exponentially fast distillation of pretrained diffusion models for one-step generation. In *Forty-first International Conference on Machine Learning*, 2024.

## 507 A Proofs

### 508 A.1 Proof of Theorem 3.1

509 *Proof.* Let  $p_t$  and  $q_t$  be distributions satisfying the Fokker-Planck equations, and decay rapidly at  
510 infinity:

$$\begin{aligned}\frac{\partial p_{\theta,t}}{\partial t} &= \nabla_{\mathbf{x}} \cdot \left[ \frac{1}{2} g^2(t) p_{\theta,t} \nabla_{\mathbf{x}} \log p_{\theta,t} - \mathbf{F}(\mathbf{x}, t) p_{\theta,t} \right] \\ \frac{\partial q_t}{\partial t} &= \nabla_{\mathbf{x}} \cdot \left[ \frac{1}{2} g^2(t) q_t \nabla_{\mathbf{x}} \log q_t - \mathbf{F}(\mathbf{x}, t) q_t \right]\end{aligned}\quad (\text{A.1})$$

511 We begin with the definition of  $f$ -divergence and apply differentiation under the integral sign:

$$\begin{aligned}\frac{d}{dt} \mathcal{D}_f(q_t \| p_{\theta,t}) &= \frac{d}{dt} \int p_{\theta,t} f\left(\frac{q_t}{p_{\theta,t}}\right) d\mathbf{x} \\ &= \int \frac{\partial p_{\theta,t}}{\partial t} f\left(\frac{q_t}{p_{\theta,t}}\right) d\mathbf{x} + \int p_{\theta,t} \frac{\partial}{\partial t} f\left(\frac{q_t}{p_{\theta,t}}\right) d\mathbf{x}\end{aligned}\quad (\text{A.2})$$

512 For the second term, apply the chain rule and the quotient rule:

$$\begin{aligned}\int p_{\theta,t} \frac{\partial}{\partial t} f\left(\frac{q_t}{p_{\theta,t}}\right) d\mathbf{x} &= \int p_{\theta,t} f'\left(\frac{q_t}{p_{\theta,t}}\right) \frac{\partial}{\partial t} \left(\frac{q_t}{p_{\theta,t}}\right) d\mathbf{x} \\ &= \int f'\left(\frac{q_t}{p_{\theta,t}}\right) \left(\frac{\partial q_t}{\partial t} - \frac{q_t}{p_{\theta,t}} \frac{\partial p_{\theta,t}}{\partial t}\right) d\mathbf{x}\end{aligned}\quad (\text{A.3})$$

513 Combining Eq. A.1, Eq. A.2 and Eq. A.3, we obtain:

$$\begin{aligned}\frac{d}{dt} \mathcal{D}_f(q_t \| p_{\theta,t}) &= \int \nabla_{\mathbf{x}} \left[ \frac{1}{2} g^2(t) p_{\theta,t} \nabla_{\mathbf{x}} \log p_{\theta,t} - \mathbf{F}(\mathbf{x}, t) p_{\theta,t} \right] f\left(\frac{q_t}{p_{\theta,t}}\right) d\mathbf{x} \\ &\quad + \int f'\left(\frac{q_t}{p_{\theta,t}}\right) \nabla_{\mathbf{x}} \left[ \frac{1}{2} g^2(t) q_t \nabla_{\mathbf{x}} \log q_t - \mathbf{F}(\mathbf{x}, t) q_t \right] d\mathbf{x} \\ &\quad - \int \frac{q_t}{p_{\theta,t}} f'\left(\frac{q_t}{p_{\theta,t}}\right) \nabla_{\mathbf{x}} \left[ \frac{1}{2} g^2(t) p_{\theta,t} \nabla_{\mathbf{x}} \log p_{\theta,t} - \mathbf{F}(\mathbf{x}, t) p_{\theta,t} \right] d\mathbf{x}\end{aligned}\quad (\text{A.4})$$

514 Apply integration by parts to the RHS of Eq. A.4 and with previous assumption that distribution  $p_{\theta,t}$   
515 and  $q_t$  decay rapidly at infinity, we have:

$$\begin{aligned}\frac{d}{dt} \mathcal{D}_f(q_t \| p_{\theta,t}) &= - \int \left[ \frac{1}{2} g^2(t) p_{\theta,t} \nabla_{\mathbf{x}} \log p_{\theta,t} - \mathbf{F}(\mathbf{x}, t) p_{\theta,t} \right] \nabla_{\mathbf{x}} f\left(\frac{q_t}{p_{\theta,t}}\right) d\mathbf{x} \\ &\quad - \int \nabla_{\mathbf{x}} f'\left(\frac{q_t}{p_{\theta,t}}\right) \left[ \frac{1}{2} g^2(t) q_t \nabla_{\mathbf{x}} \log q_t - \mathbf{F}(\mathbf{x}, t) q_t \right] d\mathbf{x} \\ &\quad + \int \nabla_{\mathbf{x}} \left[ \frac{q_t}{p_{\theta,t}} f'\left(\frac{q_t}{p_{\theta,t}}\right) \right] \left[ \frac{1}{2} g^2(t) p_{\theta,t} \nabla_{\mathbf{x}} \log p_{\theta,t} - \mathbf{F}(\mathbf{x}, t) p_{\theta,t} \right] d\mathbf{x}\end{aligned}\quad (\text{A.5})$$

516 Now we can further expand the gradient terms in Eq. A.5:

$$\nabla_{\mathbf{x}} f\left(\frac{q_t}{p_{\theta,t}}\right) = f'\left(\frac{q_t}{p_{\theta,t}}\right) \frac{\nabla_{\mathbf{x}} q_t p_{\theta,t} - \nabla_{\mathbf{x}} p_{\theta,t} q_t}{p_{\theta,t}^2} \quad (\text{A.6})$$

517

$$\nabla_{\mathbf{x}} f'\left(\frac{q_t}{p_{\theta,t}}\right) = f''\left(\frac{q_t}{p_{\theta,t}}\right) \frac{\nabla_{\mathbf{x}} q_t p_{\theta,t} - \nabla_{\mathbf{x}} p_{\theta,t} q_t}{p_{\theta,t}^2} \quad (\text{A.7})$$

518

$$\nabla_{\mathbf{x}} \left[ \frac{q_t}{p_{\theta,t}} f'\left(\frac{q_t}{p_{\theta,t}}\right) \right] = f'\left(\frac{q_t}{p_{\theta,t}}\right) \frac{\nabla_{\mathbf{x}} q_t p_{\theta,t} - \nabla_{\mathbf{x}} p_{\theta,t} q_t}{p_{\theta,t}^2} + \frac{q_t}{p_{\theta,t}} f''\left(\frac{q_t}{p_{\theta,t}}\right) \frac{\nabla_{\mathbf{x}} q_t p_{\theta,t} - \nabla_{\mathbf{x}} p_{\theta,t} q_t}{p_{\theta,t}^2} \quad (\text{A.8})$$

519 Replace the gradient terms in Eq. A.5 with Eq. A.6, Eq. A.7, and Eq. A.8 and after algebraic  
520 manipulation, we obtain:

$$\frac{d}{dt} \mathcal{D}_f(q_0 \| p_\theta) = -\frac{1}{2} g^2(t) \int p_{\theta,t} \left( \frac{q_t}{p_{\theta,t}} \right)^2 f'' \left( \frac{q_t}{p_{\theta,t}} \right) \|\nabla_{\mathbf{x}} \log q_t - \nabla_{\mathbf{x}} \log p_{\theta,t}\|^2 d\mathbf{x} \quad (\text{A.9})$$

521

□

## 522 A.2 Proof of Theorem 3.2

523 **Lemma A.1** (Calculate the gradient of  $\mathbf{x} \sim p_{\theta,t}$  [63]). *Assuming that sampling from  $\mathbf{x} \sim p_{\theta,t}$  can be*  
524 *parameterized as  $\mathbf{x} = G_\theta(\mathbf{z}) + \sigma(t)\epsilon$ , where  $\mathbf{z} \sim p(\mathbf{z})$ ,  $\epsilon \sim \mathcal{N}(0, I)$ , and  $G_\theta, g$  are differentiable*  
525 *mappings. In addition,  $g$  is constant with respect to  $\theta$ . Then,*

$$\int \nabla_{\theta} p_{\theta,t}(\mathbf{x}) g(\mathbf{x}) d\mathbf{x} = \int \int p(\epsilon) p(\mathbf{z}) \nabla_{\mathbf{x}} g(\mathbf{x}) \nabla_{\theta} G_{\theta}(\mathbf{z}) d\epsilon d\mathbf{z}.$$

526 *Proof.* As  $q_t$  and  $g$  are both continuous functions, we can interchange integration and differentiation:

$$\begin{aligned} \int \nabla_{\theta} p_{\theta,t}(\mathbf{x}) g(\mathbf{x}) d\mathbf{x} &= \nabla_{\theta} \int p_{\theta,t}(\mathbf{x}) g(\mathbf{x}) d\mathbf{x} \\ &= \int \int p(\epsilon) p(\mathbf{z}) \nabla_{\theta} g(G_{\theta}(\mathbf{z}) + \sigma(t)\epsilon) d\epsilon d\mathbf{z} \\ &= \int \int p(\epsilon) p(\mathbf{z}) \nabla_{\mathbf{x}} g(\mathbf{x}) \nabla_{\theta} G_{\theta}(\mathbf{z}) d\epsilon d\mathbf{z} \\ &= \int p_{\theta,t}(\mathbf{x}) \nabla_{\mathbf{x}} g(\mathbf{x}) \frac{\partial \mathbf{x}}{\partial \theta} d\mathbf{x}, \end{aligned}$$

527 where  $\mathbf{x} = G_{\theta}(\mathbf{z}) + \sigma(t)\epsilon$ . □

528 **Lemma A.2** (Calculate the gradient of the score fuction [34]). *If distribution  $p_{\theta,t}$  satisfies some mild*  
529 *regularity conditions, we have for any score function  $\mathbf{s}_{q_t}(\cdot)$ , the following equation holds for all*  
530 *parameter  $\theta$ :*

$$\mathbb{E}_{\mathbf{x}_t \sim p_{sg[\theta],t}} \left[ (\mathbf{s}_{p_{\theta,t}}(\mathbf{x}_t) - \mathbf{s}_{q_t}(\mathbf{x}_t)) \frac{\partial}{\partial \theta} \mathbf{s}_{p_{\theta,t}}(\mathbf{x}_t) \right] \quad (\text{A.10})$$

$$= -\frac{\partial}{\partial \theta} \mathbb{E} \left[ \{(\mathbf{s}_{sg[\theta],t}(\mathbf{x}_t) - \mathbf{s}_{q_t}(\mathbf{x}_t))\}^T \{ \mathbf{s}_{sg[\theta],t}(\mathbf{x}_t) - \nabla_{\mathbf{x}_t} \log q_t(\mathbf{x}_t | \mathbf{x}_0) \} \right] \quad (\text{A.11})$$

531 For completeness, we appreciate the efforts of Luo et al. [34] and provide the proof here. The original  
532 version can be referred to Theorem 3.1 from [34].

533 *Proof.* Starting with score projection identity [73]:

$$\mathbb{E}_{\substack{\mathbf{x}_0 \sim p_{\theta,0} \\ \mathbf{x}_t | \mathbf{x}_0 \sim q_t(\mathbf{x}_t | \mathbf{x}_0)}} \{u(\mathbf{x}_t, \theta)^T (\mathbf{s}_{p_{\theta,t}}(\mathbf{x}_t) - \nabla_{\mathbf{x}_t} \log q_t(\mathbf{x}_t | \mathbf{x}_0))\} = 0, \quad \forall \theta, \forall u. \quad (\text{A.12})$$

534 Taking the gradient with respect to  $\theta$  on the above identity, we have:

$$0 = \mathbb{E}_{\substack{\mathbf{x}_0 \sim p_{\theta,0} \\ \mathbf{x}_t | \mathbf{x}_0 \sim q_t(\mathbf{x}_t | \mathbf{x}_0)}} \left\{ \frac{\partial}{\partial \mathbf{x}_t} (u(\mathbf{x}_t, \theta)^T \{ \mathbf{s}_{p_{\theta,t}}(\mathbf{x}_t) - \nabla_{\mathbf{x}_t} \log q_t(\mathbf{x}_t | \mathbf{x}_0) \}) \right\} \frac{\partial \mathbf{x}_t}{\partial \theta} \quad (\text{A.13})$$

$$+ \mathbb{E}_{\substack{\mathbf{x}_0 \sim p_{\theta,0} \\ \mathbf{x}_t | \mathbf{x}_0 \sim q_t(\mathbf{x}_t | \mathbf{x}_0)}} \left\{ \frac{\partial}{\partial \mathbf{x}_0} (u(\mathbf{x}_t, \theta)^T \{ -\nabla_{\mathbf{x}_t} \log q_t(\mathbf{x}_t | \mathbf{x}_0) \}) \right\} \frac{\partial \mathbf{x}_0}{\partial \theta} \quad (\text{A.14})$$

$$+ \mathbb{E}_{\substack{\mathbf{x}_0 \sim p_{\theta,0} \\ \mathbf{x}_t | \mathbf{x}_0 \sim q_t(\mathbf{x}_t | \mathbf{x}_0)}} \left\{ u(\mathbf{x}_t, \theta)^T \frac{\partial}{\partial \theta} \{ \mathbf{s}_{p_{\theta,t}}(\mathbf{x}_t) \} \right\} + \frac{\partial}{\partial \theta} u(\mathbf{x}_t, \theta)^T \mathbf{s}_{\theta}(\mathbf{x}_t) \quad (\text{A.15})$$

$$= \mathbb{E}_{\substack{\mathbf{x}_0 \sim p_{\theta,0} \\ \mathbf{x}_t | \mathbf{x}_0 \sim q_t(\mathbf{x}_t | \mathbf{x}_0)}} \left\{ u(\mathbf{x}_t, \theta)^T \frac{\partial}{\partial \theta} \{ \mathbf{s}_{p_{\theta,t}}(\mathbf{x}_t) \} \right\} \quad (\text{A.16})$$

$$+ \mathbb{E}_{\substack{\mathbf{x}_0 \sim p_{\theta,0} \\ \mathbf{x}_t | \mathbf{x}_0 \sim q_t(\mathbf{x}_t | \mathbf{x}_0)}} \left\{ \frac{\partial}{\partial \mathbf{x}_t} \left\{ \frac{\partial}{\partial \theta} (u(\mathbf{x}_t, \theta)^T \{ \mathbf{s}_{p_{\theta,t}}(\mathbf{x}_t) - \nabla_{\mathbf{x}_t} \log q_t(\mathbf{x}_t | \mathbf{x}_0) \}) \right\} \frac{\partial \mathbf{x}_t}{\partial \theta} \right\} \quad (\text{A.17})$$

$$+ \mathbb{E}_{\substack{\mathbf{x}_0 \sim p_{\theta,0} \\ \mathbf{x}_t | \mathbf{x}_0 \sim q_t(\mathbf{x}_t | \mathbf{x}_0)}} \left\{ \frac{\partial}{\partial \mathbf{x}_0} \{ u(\mathbf{x}_t, \theta)^T \{ -\nabla_{\mathbf{x}_t} \log q_t(\mathbf{x}_t | \mathbf{x}_0) \} \} \frac{\partial \mathbf{x}_0}{\partial \theta} + \frac{\partial}{\partial \theta} u(\mathbf{x}_t, \theta)^T \mathbf{s}_{\theta}(\mathbf{x}_t) \right\} \quad (\text{A.18})$$

$$= \mathbb{E}_{\mathbf{x}_t \sim p_{\theta,t}} \left\{ u(\mathbf{x}_t, \theta)^T \frac{\partial}{\partial \theta} \{ \mathbf{s}_{p_{\theta,t}}(\mathbf{x}_t) \} \right\} \quad (\text{A.19})$$

$$+ \frac{\partial}{\partial \theta} \mathbb{E}_{\substack{\mathbf{x}_0 \sim p_{\theta,0} \\ \mathbf{x}_t | \mathbf{x}_0 \sim q_t(\mathbf{x}_t | \mathbf{x}_0)}} \left\{ u(\mathbf{x}_t, \theta)^T \{ \mathbf{s}_{p_{\theta,t}}(\mathbf{x}_t) - \nabla_{\mathbf{x}_t} \log q_t(\mathbf{x}_t | \mathbf{x}_0) \} \right\}. \quad (\text{A.20})$$

535 Therefore, we obtain the following identity:

$$\mathbb{E}_{\mathbf{x}_t \sim p_{\theta,t}} \left\{ u(\mathbf{x}_t, \theta)^T \frac{\partial}{\partial \theta} \mathbf{s}_{p_{\theta,t}}(\mathbf{x}_t) \right\} = - \frac{\partial}{\partial \theta} \mathbb{E}_{\substack{\mathbf{x}_0 \sim p_{\theta,0} \\ \mathbf{x}_t | \mathbf{x}_0 \sim q_t(\mathbf{x}_t | \mathbf{x}_0)}} \left\{ u(\mathbf{x}_t, \theta)^T (\mathbf{s}_{p_{\theta,t}}(\mathbf{x}_t) - \nabla_{\mathbf{x}_t} \log q_t(\mathbf{x}_t | \mathbf{x}_0)) \right\}. \quad (\text{A.21})$$

536 Replacing  $u(\mathbf{x}_t)$  with  $\mathbf{s}_{p_{\theta,t}}(\mathbf{x}_t) - \mathbf{s}_{q_t}(\mathbf{x}_t)$  we can proof the correctness of the original identity.

537 □

538 We now complete the proof of Theorem 3.2:

539 *Proof.* Applying the product rule to the gradient, we can obtain:

$$\nabla_{\theta} \left\{ \frac{1}{2} g^2(t) \mathbb{E}_{p_{\theta,t}} \left[ \left( \frac{q_t}{p_{\theta,t}} \right)^2 f'' \left( \frac{q_t}{p_{\theta,t}} \right) \|\nabla \log p_{\theta,t} - \nabla \log q_t\|_2^2 \right] \right\} \quad (\text{A.22})$$

$$= \frac{1}{2} g^2(t) \nabla_{\theta} \int p_{\theta,t}(\mathbf{x}_t) \left( \frac{q_t}{p_{\theta,t}} \right)^2 f'' \left( \frac{q_t}{p_{\theta,t}} \right) \|\nabla \log p_{\theta,t} - \nabla \log q_t\|_2^2 d\mathbf{x}_t \quad (\text{A.23})$$

$$= \frac{1}{2} g^2(t) \int \nabla_{\theta} p_{\theta,t}(\mathbf{x}_t) \left( \frac{q_t}{p_{\theta,t}} \right)^2 f'' \left( \frac{q_t}{p_{\theta,t}} \right) \|\nabla \log p_{\theta,t} - \nabla \log q_t\|_2^2 d\mathbf{x}_t \quad (\text{A.24})$$

$$+ \frac{1}{2} g^2(t) \int p_{\theta,t}(\mathbf{x}_t) \nabla_{\theta} \left[ \left( \frac{q_t}{p_{\theta,t}} \right)^2 f'' \left( \frac{q_t}{p_{\theta,t}} \right) \|\nabla \log p_{\theta,t} - \nabla \log q_t\|_2^2 \right] d\mathbf{x}_t, \quad (\text{A.25})$$



540 which can be further decomposed into the following four terms:

$$\text{Grad} = \underbrace{\frac{1}{2}g^2(t) \int \nabla_{\theta} p_{\theta,t}(\mathbf{x}_t) \left(\frac{q_t}{p_{\theta,t}}\right)^2 f''\left(\frac{q_t}{p_{\theta,t}}\right) \|\nabla \log p_{\theta,t} - \nabla \log q_t\|_2^2 d\mathbf{x}_t}_{A} \quad (\text{A.26})$$

$$+ \underbrace{\frac{1}{2}g^2(t) \int p_{\theta,t}(\mathbf{x}_t) \nabla_{\theta} \left[\left(\frac{q_t}{p_{\theta,t}}\right)^2\right] f''\left(\frac{q_t}{p_{\theta,t}}\right) \|\nabla \log p_{\theta,t} - \nabla \log q_t\|_2^2 d\mathbf{x}_t}_{B} \quad (\text{A.27})$$

$$+ \underbrace{\frac{1}{2}g^2(t) \int p_{\theta,t}(\mathbf{x}_t) \left(\frac{q_t}{p_{\theta,t}}\right)^2 \nabla_{\theta} \left[f''\left(\frac{q_t}{p_{\theta,t}}\right)\right] \|\nabla \log p_{\theta,t} - \nabla \log q_t\|_2^2 d\mathbf{x}_t}_{C} \quad (\text{A.28})$$

$$+ \underbrace{\frac{1}{2}g^2(t) \int p_{\theta,t}(\mathbf{x}_t) \left(\frac{q_t}{p_{\theta,t}}\right)^2 f''\left(\frac{q_t}{p_{\theta,t}}\right) \nabla_{\theta} [\|\nabla \log p_{\theta,t} - \nabla \log q_t\|_2^2] d\mathbf{x}_t}_{D} \quad (\text{A.29})$$

541 We calculate the above four terms separately.

$$A = \frac{1}{2}g^2(t) \int \nabla_{\theta} p_{\theta,t}(\mathbf{x}_t) \left(\frac{q_t}{p_{\theta,t}}\right)^2 f''\left(\frac{q_t}{p_{\theta,t}}\right) \|\nabla \log p_{\theta,t} - \nabla \log q_t\|_2^2 d\mathbf{x}_t \quad (\text{A.30})$$

$$= \frac{1}{2}g^2(t) \int q_t(\mathbf{x}_t) \left(2\frac{p_t}{q_t} \nabla_{\mathbf{x}} \frac{p_t}{q_t} \frac{\partial \mathbf{x}_t}{\partial \theta}\right) f''\left(\frac{p_t}{q_t}\right) \|\nabla \log p_t - \nabla \log q_t\|_2^2 d\mathbf{x}_t \quad (\text{A.31})$$

$$+ \frac{1}{2}g^2(t) \int q_t(\mathbf{x}_t) \left(\frac{p_t}{q_t}\right)^2 \left(f'''\left(\frac{p_t}{q_t}\right) \nabla_{\mathbf{x}} \frac{p_t}{q_t} \frac{\partial \mathbf{x}_t}{\partial \theta}\right) \|\nabla \log p_t - \nabla \log q_t\|_2^2 d\mathbf{x}_t \quad (\text{A.32})$$

$$+ \frac{1}{2}g^2(t) \int q_t(\mathbf{x}_t) \left(\frac{p_t}{q_t}\right)^2 f''\left(\frac{p_t}{q_t}\right) \nabla_{\theta} (\|\nabla \log p_t - \nabla \log q_t\|_2^2) d\mathbf{x}_t \quad (\text{A.33})$$

$$B = \frac{1}{2}g^2(t) \int p_{\theta,t}(\mathbf{x}_t) \nabla_{\theta} \left[\left(\frac{q_t}{p_{\theta,t}}\right)^2\right] f''\left(\frac{q_t}{p_{\theta,t}}\right) \|\nabla \log p_{\theta,t} - \nabla \log q_t\|_2^2 d\mathbf{x}_t \quad (\text{A.34})$$

$$= \frac{1}{2}g^2(t) \int p_{\theta,t}(\mathbf{x}_t) \left[2\left(\frac{q_t}{p_{\theta,t}}\right) \left(-\frac{q_t}{p_{\theta,t}^2}\right) \nabla_{\theta} p_{\theta,t}(\mathbf{x}_t)\right] f''\left(\frac{q_t}{p_{\theta,t}}\right) \|\nabla \log p_{\theta,t} - \nabla \log q_t\|_2^2 d\mathbf{x}_t \quad (\text{A.35})$$

$$= -\frac{1}{2}g^2(t) \int \nabla_{\theta} p_{\theta,t}(\mathbf{x}_t) \left[2\left(\frac{q_t}{p_{\theta,t}}\right)^2\right] f''\left(\frac{q_t}{p_{\theta,t}}\right) \|\nabla \log p_{\theta,t} - \nabla \log q_t\|_2^2 d\mathbf{x}_t \quad (\text{A.36})$$

$$= -2 * A \quad (\text{A.37})$$

$$C = \frac{1}{2}g^2(t) \int p_{\theta,t}(\mathbf{x}_t) \left(\frac{q_t}{p_{\theta,t}}\right)^2 \nabla_{\theta} \left[f''\left(\frac{q_t}{p_{\theta,t}}\right)\right] \|\nabla \log p_{\theta,t} - \nabla \log q_t\|_2^2 d\mathbf{x}_t \quad (\text{A.38})$$

$$= -\frac{1}{2}g^2(t) \int p_{\theta,t}(\mathbf{x}_t) \left(3\left(\frac{q_t}{p_{\theta,t}}\right)^2 \nabla_{\mathbf{x}} \frac{q_t}{p_{\theta,t}} \frac{\partial \mathbf{x}_t}{\partial \theta}\right) f'''\left(\frac{q_t}{p_{\theta,t}}\right) \|\nabla \log p_{\theta,t} - \nabla \log q_t\|_2^2 d\mathbf{x}_t \quad (\text{A.39})$$

$$- \frac{1}{2}g^2(t) \int p_{\theta,t}(\mathbf{x}_t) \left(\frac{q_t}{p_{\theta,t}}\right)^3 \left(f'''\left(\frac{q_t}{p_{\theta,t}}\right) \nabla_{\mathbf{x}} \frac{q_t}{p_{\theta,t}} \frac{\partial \mathbf{x}_t}{\partial \theta}\right) \|\nabla \log p_{\theta,t} - \nabla \log q_t\|_2^2 d\mathbf{x}_t \quad (\text{A.40})$$

$$- \frac{1}{2}g^2(t) \int p_{\theta,t}(\mathbf{x}_t) \left(\frac{q_t}{p_{\theta,t}}\right)^3 f'''\left(\frac{q_t}{p_{\theta,t}}\right) \nabla_{\theta} (\|\nabla \log p_{\theta,t} - \nabla \log q_t\|_2^2) d\mathbf{x}_t \quad (\text{A.41})$$

$$D = \frac{1}{2}g^2(t) \int p_{\theta,t}(\mathbf{x}_t) \left(\frac{q_t}{p_{\theta,t}}\right)^2 f''\left(\frac{q_t}{p_{\theta,t}}\right) \nabla_{\theta} [\|\nabla \log p_{\theta,t} - \nabla \log q_t\|_2^2] d\mathbf{x}_t \quad (\text{A.42})$$

542 As a result:

$$\nabla_{\theta} \left\{ \frac{1}{2}g^2(t) \mathbb{E}_{q_t} \left[ \left(\frac{p_t}{q_t}\right)^2 f''\left(\frac{p_t}{q_t}\right) \|\nabla \log p_t - \nabla \log q_t\|_2^2 \right] \right\} \quad (\text{A.43})$$

$$= A + B + C + D = -A + C + D \quad (\text{A.44})$$

$$= \frac{1}{2}g^2(t) \mathbb{E}_{p_{\theta,t}} \left[ \underbrace{\left(\frac{q_t}{p_{\theta,t}}\right)^3 f''' \left(\frac{q_t}{p_{\theta,t}}\right)}_{\text{weight 1}} \nabla_{\theta} \|\nabla \log p_{\theta,t} - \nabla \log q_t\|_2^2 \right] \quad (\text{A.45})$$

$$+ \frac{1}{2}g^2(t) \mathbb{E}_{p_{\theta,t}} \left[ \underbrace{(\dots) \|\nabla \log p_{\theta,t} - \nabla \log q_t\|_2^2}_{\text{weight 2}} (\nabla \log p_{\theta,t} - \nabla \log q_t) \frac{\partial \mathbf{x}_t}{\partial \theta} \right] \quad (\text{A.46})$$

543 where ... stands for  $2 \left(\frac{q_t}{p_{\theta,t}}\right)^2 f''\left(\frac{q_t}{p_{\theta,t}}\right) + 4 \left(\frac{q_t}{p_{\theta,t}}\right)^3 f''' \left(\frac{q_t}{p_{\theta,t}}\right) + \left(\frac{q_t}{p_{\theta,t}}\right)^4 f'''' \left(\frac{q_t}{p_{\theta,t}}\right)$ .

544 Applying Lemma A.2, we have:

$$\begin{aligned} & \frac{1}{2}g^2(t) \nabla_{\theta} \left\{ \mathbb{E}_{p_{\theta,t}} \left[ \left(\frac{q_t}{p_{\theta,t}}\right)^2 f''\left(\frac{q_t}{p_{\theta,t}}\right) \|\mathbf{s}_{p_{\theta,t}}(\mathbf{x}_t) - \mathbf{s}_{q_t}(\mathbf{x}_t)\|_2^2 \right] \right\} \\ &= -\frac{1}{2}g^2(t) \frac{\partial}{\partial \theta} \left\{ \mathbb{E}_{p_{\theta,t}} \left[ \text{SG} \left( \mathcal{C}_1 \left( \frac{q_t}{p_{\theta,t}} \right) \right) (\mathbf{s}_{q_t}(\mathbf{x}_t) - \mathbf{s}_{p_{sg[\theta],t}}(\mathbf{x}_t)) (\mathbf{s}_{p_{sg[\theta],t}}(\mathbf{x}_t) - \nabla_{\mathbf{x}_t} \log q_t(\mathbf{x}_t | \mathbf{x}_0)) \right] \right\} \\ & \quad - \frac{1}{2}g^2(t) \frac{\partial}{\partial \theta} \left\{ \mathbb{E}_{p_{\theta,t}} \left[ \text{SG} \left( \mathcal{C}_2 \left( \frac{q_t}{p_{\theta,t}} \right) (\mathbf{s}_{q_t}(\mathbf{x}_t) - \mathbf{s}_{p_{\theta,t}}(\mathbf{x}_t)) \|\mathbf{s}_{q_t}(\mathbf{x}_t) - \mathbf{s}_{p_{\theta,t}}(\mathbf{x}_t)\|_2^2 \right) \mathbf{x}_t \right] \right\} \end{aligned} \quad (\text{A.47})$$

545 where SG donates stop gradient operator, and the curvature coupling coefficient  $\mathcal{C}(r)$  are defined as:

$$\mathcal{C}_1(r) := r^3 f'''(r), \quad \mathcal{C}_2(r) := 2r^2 f''(r) + 4r^3 f'''(r) + r^4 f''''(r), \quad r := \frac{q_t(\mathbf{x})}{p_{\theta,t}(\mathbf{x})} \quad (\text{A.48})$$

546

□

### 547 A.3 Density Ratio Representation

548 **Theorem A.1** (Density Ratio Representation). *For adversarial discriminator conditioned on the*  
549 *timestep  $t$   $D: \mathcal{X} \times [0, T] \rightarrow [0, 1]$  satisfying:*

$$D^* = \arg \min_D \mathbb{E}_{\mathbf{x} \sim q_{\text{data}}} [-\log D(\mathbf{x}, t)] + \mathbb{E}_{\mathbf{x} \sim p_g} [-\log(1 - D(\mathbf{x}, t))], \quad (\text{A.49})$$

550 *The density ratio admits the variational representation:*

$$\frac{q_t(\mathbf{x})}{p_{\theta,t}(\mathbf{x})} = \frac{D^*(\mathbf{x}, t)}{1 - D^*(\mathbf{x}, t)}. \quad (\text{A.50})$$

551 *Proof of Theorem A.1.* Firstly, we calculate the optimal discriminator:

552 **Lemma A.3** (Optimal Discriminator Characterization). *For measurable functions  $D : \mathcal{X} \times [0, T] \rightarrow$*   
 553  *$[0, 1]$ , the minimizer of:*

$$\mathcal{J}(D) = \mathbb{E}_{\mathbf{x} \sim q_t} [-\log D(\mathbf{x}, t)] + \mathbb{E}_{\mathbf{x} \sim p_{\theta, t}} [-\log(1 - D(\mathbf{x}, t))] \quad (\text{A.51})$$

554 *satisfies the first-order optimality condition:*

$$\left. \frac{\delta \mathcal{J}}{\delta D} \right|_{D=D^*} = -\frac{q_t(\mathbf{x})}{D^*(\mathbf{x}, t)} + \frac{p_{\theta, t}(\mathbf{x})}{1 - D^*(\mathbf{x}, t)} = 0. \quad (\text{A.52})$$

555 Solving Lemma A.3's optimality condition yields:

$$D^*(\mathbf{x}, t) = \frac{q_t(\mathbf{x})}{q_t(\mathbf{x}) + p_{\theta, t}(\mathbf{x})} \quad (\text{A.53})$$

556 Through algebraic transformation, we have:

$$\frac{q_t(\mathbf{x})}{p_{\theta, t}(\mathbf{x})} = \frac{D^*(\mathbf{x}, t)}{1 - D^*(\mathbf{x}, t)}. \quad (\text{A.54})$$

557 □

#### 558 **A.4 Proof of Corollary 3.4**

559 *Proof of Corollary 3.4.* Using Theorem 3.1, assuming some mild assumptions on the growth of  $\log q_t$   
 560 and  $\log p_t$  at infinity, we have:

$$\mathcal{D}_f(q_0 || p_\theta) = \int_0^T \frac{1}{2} g^2(t) \mathbb{E}_{p_\theta} \left[ \left( \frac{q_t}{p_{\theta, t}} \right)^2 f'' \left( \frac{q_t}{p_{\theta, t}} \right) \|\nabla \log p_{\theta, t} - \nabla \log q_t\|_2^2 \right] dt. \quad (\text{A.55})$$

561 We also have the differential form of this formula:

$$\frac{d}{dt} \mathcal{D}_f(q_t || p_{\theta, t}) = -\frac{1}{2} g^2(t) \mathbb{E}_{p_{\theta, t}} \left[ \left( \frac{q_t}{p_{\theta, t}} \right)^2 f'' \left( \frac{q_t}{p_{\theta, t}} \right) \|\nabla \log p_{\theta, t} - \nabla \log q_t\|_2^2 \right]. \quad (\text{A.56})$$

562 We can re-weight Eq. A.55 for arbitrary weightings, where  $W(t)$  is selected in our case. The  
 563 re-weighted version of the RHS of Eq. A.55 can be written as:

$$\int_0^T \frac{1}{2} g^2(t) W(t) \mathbb{E}_{p_{\theta, t}} \left[ \left( \frac{q_t}{p_{\theta, t}} \right)^2 f'' \left( \frac{q_t}{p_{\theta, t}} \right) \|\nabla \log p_{\theta, t} - \nabla \log q_t\|_2^2 \right] dt. \quad (\text{A.57})$$

$$= \int_0^T -W(t) \frac{d}{dt} \mathcal{D}_f(q_t || p_{\theta, t}) dt. \quad (\text{A.58})$$

$$= -W(t) \mathcal{D}_f(q_t || p_{\theta, t}) \Big|_0^T + \int_0^T W'(t) \mathcal{D}_f(q_t || p_{\theta, t}) dt. \quad (\text{A.59})$$

$$= \int_0^T w(t) \mathcal{D}_f(q_t || p_{\theta, t}) dt. \quad (\text{A.60})$$

564 □

## 565 **B Detailed Analysis on $f$ Divergence**

566 In this section, we provide several example divergences derived from our Uni-Instruct framework.  
 567 Tab. 5 summarizes five types of divergence.

| Divergence | $f(r)$                                   | $\mathcal{C}_1(r)$         | $\mathcal{C}_2(r)$      | Mode-Seeking? |
|------------|------------------------------------------|----------------------------|-------------------------|---------------|
| FKL        | $r \log r$                               | $-r$                       | 0                       | -             |
| RKL        | $-\log r$                                | -1                         | 0                       | ✓             |
| JKL        | $(r-1) \log r$                           | $-r-1$                     | 0                       | -             |
| $\chi^2$   | $(r-1)^2$                                | 0                          | $4r^2$                  | -             |
| JS         | $r \log r - (r+1) \log(r + \frac{1}{2})$ | $-\frac{r(2r+1)}{(r+1)^2}$ | $-\frac{2r^2}{(r+1)^3}$ | ✓             |

Table 5: Comparison of different  $f$ -divergences as a function of the likelihood ratio  $r := \frac{q_t(\mathbf{x})}{p_{\theta,t}(\mathbf{x})}$

**Mode Seeking vs. Mode Covering** For arbitrary  $f$  divergence  $\mathcal{D}_f(q||p) = \int p(\mathbf{x}) f\left(\frac{q(\mathbf{x})}{p(\mathbf{x})}\right) d\mathbf{x}$ , it can be classified into two categories based on its mode seeking behavior. Divergences that are mode-seeking tend to push the generative distribution  $p_\theta$  toward reproducing only a subset of the modes of the data distribution  $p$ . This selectivity is problematic for generative modeling because it can cause missing modes and reduce sample diversity. Such mode collapse has been noted for the integral KL loss employed in Diff-Instruct and DMD [33, 66]. A convenient way to quantify mode-seeking behavior is to inspect the limit  $\lim_{r \rightarrow \infty} f(r)/r$ : the smaller this limit grows, the stronger the mode-seeking tendency. Both reverse KL and Jensen–Shannon (JS) divergences have a finite value for this limit. By contrast, forward KL, Jeffrey KL, and  $\chi^2$  yield an infinite limit, reflecting its well-known mode-covering nature, which tends to recover the entire data distribution  $q$ . In practice, we observed that mode covering divergences such as forward-KL and Jeffrey-KL achieves a lower FID score.

**Grad(SIM) vs. Grad(DI)** Another way to inspect different  $f$  divergence is checking the gradient expression. It is worth mentioning that the gradient expression of Uni-Instruct is composed of Grad(SIM) and Grad(DI) (Eq. 3.6). For KL divergence (reverse, forward, Jeffrey),  $\mathcal{C}_2(r) = 0$  and the gradient is only contributed by Grad(SIM). On contrary, when selecting  $\chi^2$  divergence,  $\mathcal{C}_2(r) = 0$  and the gradient is only contributed by Grad(DI). The gradient expression of Jensen-Shannon (JS) is a combination of both.

**Training Stability** However, during training we often observe training instability in Jensen-Shannon divergence and  $\chi^2$  divergence, due to the complex expression of  $\mathcal{C}_1(r)$  and  $\mathcal{C}_2(r)$ , which will result in higher FID score (Tab. 4). Tricks such as normalizing the weighting function or implementing the discriminator on the teacher model [63] can be applied to stabilize training. We leave this part to future work.

## C Unified Distillation Loss

In this section, we discuss how Uni-Instruct unifies previous diffusion distillation methods through recovering previous methods into a special case of Uni-Instruct. We summarize the connections in Tab. 6.

### C.1 One Step Diffusion Model Distillation

From Section 3.3 and Corollary 3.4, we have demonstrated that integral KL-based divergence minimization can be treated as Uni-Instruct with special weighting. More surprisingly, we found that if we choose  $\chi^2$ -divergence in Uni-Instruct, the weighting of SIM becomes 0 and the remaining gradient is only contributed by Diff-Instruct, as is shown in Tab. 5 and the third column of Tab. 6. In this way, Uni-Instruct can unify the first line of work: Diff-Instruct [33] is Uni-Instruct with  $\chi^2$ -divergence. DMD [66] added extra regression loss contributed by pre-sampled paired images, while DMD2 [65] added an adversarial loss. SwiftBrush [17] applied the same loss on text-to-image generation.  $f$ -distill [63] can be seen as Uni-Instruct with manually selected weighting, and has a gradient expression of ( $\chi^2$ ) divergence in Uni-Instruct.

Moreover, in Sec. 3.3, we demonstrate that leveraging the connection between KL divergence and score-based divergence, score matching can be interpreted as minimizing single-step KL divergence. Thus, selecting reverse-KL (RKL) divergence in Uni-Instruct, we can recover score-based divergence,

| Method                  | Loss                     | Div. in UI | Task                             | Loss Function                                                                             | Gradient Expression                                                                                                                                                                   |
|-------------------------|--------------------------|------------|----------------------------------|-------------------------------------------------------------------------------------------|---------------------------------------------------------------------------------------------------------------------------------------------------------------------------------------|
| Diff-Instruct (DI) [33] | IKL Div.                 | $\chi^2$   | One-Step Diffusion               | $\int w(t) \mathcal{D}_{\text{KL}}(p_{\theta,t}    q_0) dt$                               | $(s_{p_{\theta,t}}(\mathbf{x}_t) - s_{q_t}(\mathbf{x}_t)) \frac{\partial \mathbf{x}_t}{\partial \theta}$                                                                              |
| DI++ [32]               | IKL Div. + Reward        | $\chi^2$   | Human Aligned One-Step Diffusion | $\int w(t) \mathcal{D}_{\text{KL}}(p_{\theta,t}    q_0) dt + \mathcal{L}_{\text{reward}}$ | $\text{Grad}(\text{DI}) + \nabla_{\theta} \mathcal{L}_{\text{reward}}$                                                                                                                |
| DI* [35]                | KL Div. + Reward         | RKL        | Human Aligned One-Step Diffusion | $\mathcal{D}_{\text{KL}}(p_{\theta,t}    q_0) + \mathcal{L}_{\text{reward}}$              | $\text{Grad}(\text{SIM}) + \nabla_{\theta} \mathcal{L}_{\text{reward}}$                                                                                                               |
| SDS [44]                | IKL Div.                 | $\chi^2$   | Text to 3D                       | $\int w(t) \mathcal{D}_{\text{KL}}(p_{\theta,t}    q_0) dt$                               | $\text{Grad}(\text{DI})$                                                                                                                                                              |
| DDS [14]                | IKL Div.                 | $\chi^2$   | Image Editing                    | $\int w(t) \mathcal{D}_{\text{KL}}(p_{\theta,t}    q_0) dt$                               | $\text{Grad}(\text{DI})$                                                                                                                                                              |
| VSD [59]                | IKL Div.                 | $\chi^2$   | Text to 3D                       | $\int w(t) \mathcal{D}_{\text{KL}}(p_{\theta,t}    q_0) dt$                               | $\text{Grad}(\text{DI})$                                                                                                                                                              |
| DMD [66]                | IKL Div. + Reg.          | $\chi^2$   | One-Step Diffusion               | $\int w(t) \mathcal{D}_{\text{KL}}(p_{\theta,t}    q_0) dt + \mathcal{L}_{\text{MSE}}$    | $\text{Grad}(\text{DI}) + \nabla_{\theta} \text{MSE}$                                                                                                                                 |
| RedDiff [37]            | IKL Div. + Data Fidelity | $\chi^2$   | Inverse Problem                  | $\int w(t) \mathcal{D}_{\text{KL}}(p_{\theta,t}    q_0) dt + \mathcal{L}_{\text{MSE}}$    | $\text{Grad}(\text{DI}) + \nabla_{\theta} \text{MSE}$                                                                                                                                 |
| DMD2 [65]               | IKL Div. + GAN           | $\chi^2$   | One-Step Diffusion               | $\int w(t) \mathcal{D}_{\text{KL}}(p_{\theta,t}    q_0) dt + \mathcal{L}_{\text{adv.}}$   | $\text{Grad}(\text{DI}) + \nabla_{\theta} \mathcal{L}_{\text{adv.}}$                                                                                                                  |
| Swift Brush [17]        | IKL Div.                 | $\chi^2$   | One-Step Diffusion               | $\int w(t) \mathcal{D}_{\text{KL}}(p_{\theta,t}    q_0) dt$                               | $\text{Grad}(\text{DI})$                                                                                                                                                              |
| SIM [34]                | General KL Div.          | RKL        | One-Step Diffusion               | $\mathcal{D}_{\text{KL}}(p_{\theta,t}    q_0)$                                            | $\frac{\partial}{\partial \theta} (s_{q_t}(\mathbf{x}_t) - s_{p_{\theta,t}}(\mathbf{x}_t)) \cdot (s_{p_{sg[\theta],t}}(\mathbf{x}_t) - \nabla \log q_t(\mathbf{x}_t   \mathbf{x}_0))$ |
| SiD [73]                | KL Div.                  | RKL        | One-Step Diffusion               | $\mathcal{D}_{\text{KL}}(p_{\theta,t}    q_0)$                                            | $\text{Grad}(\text{SIM})$                                                                                                                                                             |
| SiDA [72]               | KL Div. + GAN            | RKL        | One-Step Diffusion               | $\mathcal{D}_{\text{KL}}(p_{\theta,t}    q_0) + \mathcal{L}_{\text{adv.}}$                | $\text{Grad}(\text{SIM}) + \nabla_{\theta} \mathcal{L}_{\text{adv.}}$                                                                                                                 |
| SiD-LSG [71]            | KL Div.                  | RKL        | One-Step Diffusion               | $\mathcal{D}_{\text{KL}}(p_{\theta,t}    q_0)$                                            | $\text{Grad}(\text{SIM})$                                                                                                                                                             |
| $f$ -distill [63]       | $f$ -Div. + GAN          | $\chi^2$   | One-Step Diffusion               | $\int w(t) \mathcal{D}_f(q_0    p_{\theta,t}) dt + \mathcal{L}_{\text{adv.}}$             | $\lambda_f \text{Grad}(\text{DI}) + \nabla_{\theta} \mathcal{L}_{\text{adv.}}$                                                                                                        |
| Uni-Instruct (Ours)     | $f$ Div. + GAN           | All        | All                              | $\mathcal{D}_f(q_0    p_{\theta,t}) + \mathcal{L}_{\text{adv.}}$                          | $\nabla_{\theta} \mathcal{L}_{\text{adv.}} + \lambda_f^{\text{DI}} \text{Grad}(\text{DI}) + \lambda_f^{\text{SIM}}(\mathbf{x}) \text{Grad}(\text{SIM})$                               |

Table 6: Distribution matching diffusion distillation loss family. Our method not only extends the distribution matching framework theoretically, but also unifies all previous gradient expressions with specific weightings.

as shown in the third column of Tab. 6. In this way, SIM [34] and SiD [73] minimize Uni-Instruct loss with RKL. Additional adversarial loss is added in SiDA[72], while text-to-image distillation is applied in SiD-LSG[71], both under the same Uni-Instruct(RKL) setting. Though our experiments on benchmark datasets have already demonstrated the superior performance of Uni-Instruct on distilling a one-step diffusion model (Sec. 5). We believe Uni-Instruct can be further applied to large-scale datasets and text-to-image diffusion models. We leave that to future work.

## C.2 Text-to-3D Generation with Diffusion Distillation

DreamFusion [44] and ProlificDreamer [59] propose to leverage text-to-image diffusion models to distill neural radiance fields (NeRF) [39], enabling efficient text-to-3D generation from a fixed text prompt. DreamFusion utilizes a pretrained text-to-image diffusion model to guide the optimization of a NeRF network by performing score-distillation sampling (SDS). This method minimizes KL divergence that aligns the rendered images from NeRF with the guidance from a pretrained diffusion model.

ProlificDreamer further advances this concept by introducing variational distillation, which involves training an extra student network to stabilize and enhance the distillation process. Specifically, denote  $p_{\theta}(\mathbf{x}|c, y)$  as the implicit distribution of the rendered image  $\mathbf{x} := g(\theta, c)$  given the camera  $c$  with the rendering function  $g(\cdot, c)$ , while  $q_0(\mathbf{x}|y^c)$  as the distribution modeled by the pretrained text-to-image diffusion model with the view-dependent prompt  $y^c$ . ProlificDreamer approximates the intractable implicit distribution posterior distribution  $p_{\theta}(\mathbf{x}|c, y)$  by minimizing the integral KL divergence between the diffusion-guided posterior and the implicit distribution rendered by NeRF:

$$\mathcal{D}_{\text{IKL}}(p_{\theta}(\mathbf{x}|c, y) || q_0(\mathbf{x}|y^c)) := \int_0^T w(t) \mathbb{E} p_{\theta,t}(\mathbf{x}_t | c, y) \left[ \log \frac{p_{\theta,t}(\mathbf{x}_t | c, y)}{q_t(\mathbf{x}_t | y^c)} \right] dt. \quad (\text{C.1})$$

Utilizing Corollary 3.4, we observe that by choosing suitable weighting functions  $W(t)$ , the integral KL divergence used by ProlificDreamer corresponds to the reverse KL (RKL) version of Uni-Instruct:

$$\int_0^T w(t) \mathcal{D}_{\text{KL}}(p_{\theta,t}(\mathbf{x}_t|c, y) || q_t(\mathbf{x}_t)) dt = \int_0^T \frac{1}{2} g^2(t) W(t) \mathbb{E}_{p_{\theta,t}} [\|\mathbf{s}_{p_{\theta,t}}(\mathbf{x}) - \mathbf{s}_{q_t}(\mathbf{x})\|_2^2] dt, \quad (\text{C.2})$$

ignoring  $W(t)$  becomes the RKL loss function we applied in our experiments.

Moreover, the gradient expression of DreamFusion and ProlificDreamer can be seamlessly unified under the Uni-Instruct framework, specifically aligning with the  $\chi^2$  divergence case of Uni-Instruct (third column of Tab. 6). Our experiments indicate that employing Uni-Instruct with KL-based divergence in the text-to-3D setting slightly improves the quality of generated 3D objects (App. E).

### C.3 Solving Inverse Problems with Diffusion Distillation

To solve a general noisy inverse problem, which seeks to find  $\mathbf{x}$  from a corrupted observation:

$$\mathbf{y} = h(\mathbf{x}) + v, v \sim \mathcal{N}(0, \sigma_v^2 \mathbf{I}) \quad (\text{C.3})$$

where the forward model  $h$  is known, we aim to compute the posterior  $p(\mathbf{x}|\mathbf{y})$  to recover underlying signals  $\mathbf{x}$  from its observation  $\mathbf{y}$ . The intractable posterior  $p(\mathbf{x}|\mathbf{y})$  can be approximated by  $q(\mathbf{x}|\mathbf{y})$  through variational inference, where  $q := \mathcal{N}(\mu, \sigma^2 \mathbf{I})$  is the variational distribution. Starting from minimizing the KL divergence between these two distributions, we have:

$$\mathcal{D}_{\text{KL}}(p_{\theta}(\mathbf{x}|\mathbf{y}) || p(\mathbf{x}|\mathbf{y})) = -\mathbb{E}_{q(\mathbf{x}|\mathbf{y})} [\log p(\mathbf{y}|\mathbf{x})] + \mathcal{D}_{\text{KL}}(p_{\theta}(\mathbf{x}|\mathbf{y}) || q(\mathbf{x})) + \log p(\mathbf{y}), \quad (\text{C.4})$$

where the first term is tractable based on the forward model of the inverse problem and the third term is irrelevant to the optimization problem. RedDiff [37] proposed to estimate the second term with diffusion distillation. Specifically, they expand the KL term with integral KL through manually adding time weighting  $w(t)$ :  $\mathcal{D}_{\text{IKL}}(p_{\theta}(\mathbf{x}|\mathbf{y}) || q_0(\mathbf{x})) := \int_{t=0}^T w(t) \mathbb{E}_{p_{\theta,t}(\mathbf{x}_t|\mathbf{y})} \left\{ \log \frac{p_{\theta,t}(\mathbf{x}_t|\mathbf{y})}{q_t(\mathbf{x}_t)} \right\} dt$ . Using Corollary 3.4, choosing  $W(t) = \int w(t) dt + C, W(0) = 0$ , we can recover the RKL version of Uni-Instruct:

$$\int_0^T w(t) \mathcal{D}_{\text{KL}}(p_{\theta,t}(\mathbf{x}_t|\mathbf{y}) || q_t(\mathbf{x}_t)) dt = \int_0^T \frac{1}{2} g^2(t) W(t) \mathbb{E}_{p_{\theta,t}} [\|\mathbf{s}_{p_{\theta,t}}(\mathbf{x}|\mathbf{y}) - \mathbf{s}_{q_t}(\mathbf{x})\|_2^2] dt. \quad (\text{C.5})$$

### C.4 Human Preference Aligned Diffusion Models

Reinforcement learning from human feedback [42, 8] (RLHF) is proposed to incorporate human feedback knowledge to improve model performance. The RLHF method trains the model to maximize the human reward with a Kullback-Leibler divergence regularization, which is equivalent to minimizing:

$$\mathcal{L}(\theta) = \mathbb{E}_{\mathbf{x} \sim p_{\theta}(\mathbf{x})} [-r(\mathbf{x})] + \beta \mathcal{D}_{\text{KL}}(p_{\theta}(\mathbf{x}) || q_{\text{ref}}(\mathbf{x})) \quad (\text{C.6})$$

The KL divergence regularization term penalizes the distance between the optimized model and the reference model to prevent it from diverging, while the reward term encourages the model to generate outputs with high human rewards. After the RLHF finetuning process, the model will be aligned with human preferences.

The KL penalty in Eq. C.6 can be performed with diffusion distillation when aligning the diffusion model with human preference. DI++ [32] propose to penalize the second term with IKL, which minimizes the KL divergence along the diffusion forward process:

$$\mathcal{L}(\theta) = \mathbb{E}_{z \sim p_z, \mathbf{x}_0 = g_{\theta}(z)} [-r(\mathbf{x}_0)] + \beta \int_0^T w(t) \mathcal{D}_{\text{KL}}(p_{\theta}(\mathbf{x}_t) || q_{\text{ref}}(\mathbf{x}_t)) dt \quad (\text{C.7})$$

Alternatively, DI\* [35] replaces the integral KL divergence with score-based divergence:

$$\mathcal{L}(\theta) = \mathbb{E}_{\mathbf{x}_0 \sim p_{\theta}(\mathbf{x}_0)} [r(\mathbf{x}_0)] + \beta \int_0^T \frac{1}{2} g^2(t) \|\mathbf{s}_{p_{\theta,t}}(\mathbf{x}_t) - \mathbf{s}_{q_t}(\mathbf{x}_t)\|_2^2 dt \quad (\text{C.8})$$

Leveraging Corollary 3.4, the integral KL divergence in Eq. C.7 is a weighted version of KL divergence. Choosing  $W(t) = \int w(t) dt + C, W(0) = 0$ , we have:

$$\int_0^T w(t) \mathcal{D}_{\text{KL}}(q_0 || p_{\theta,t}) dt = \int_0^T \frac{1}{2} g^2(t) W(t) \mathbb{E}_{p_{\theta,t}} [\|\mathbf{s}_{p_{\theta,t}}(\mathbf{x}_t) - \mathbf{s}_{q_t}(\mathbf{x}_t)\|_2^2] dt. \quad (\text{C.9})$$



Moreover, the score based divergence in Eq. C.8 is minimizing KL divergence  $D_{\text{KL}}(p_\theta(\mathbf{x})||q_{\text{ref}}(\mathbf{x}))$ , based on Theorem 3.1, which recovers the RKL version of Uni-Instruct.

The gradient of DI++ [32] and DI\* [35] takes the form of DI [33] and SIM [34], which correspond to  $\chi^2$  and RKL divergence separately (third column of Tab. 6).

## D Practical Algorithms

In this section, we present the detailed algorithms of our experiments. Algorithm 1 shows how to distill a one-step diffusion model. Algorithm 2 shows how to distill a 3D NeRF model.

---

### Algorithm 1 Uni-Instruct Algorithm on Distilling One Step Diffusion Model

---

**Input:** pre-trained DM  $s_{q_t}$ , generator  $g_\theta$ , fake score network  $s_\psi$ , discriminator  $D_\lambda$ , divergence  $f$ , GAN weight  $w_{\text{GAN}}$ , diffusion timesteps weighting  $w(t)$ .

```

1: while not converge do
2:   Sample real images and random noises:  $\mathbf{x}_{\text{real}} \sim p_{\text{data}}, \epsilon \sim \mathcal{N}(0, I)$ 
3:   Generate fake images:  $\mathbf{x}_{\text{fake}} = g_\theta(\epsilon)$ 
4:   Update  $D_\lambda$  with discriminator loss:  $\mathcal{L}_D = -\mathbb{E}_{\mathbf{x}_{\text{real}}}[\log D_\lambda(\mathbf{x}_{\text{real}})] - \mathbb{E}_{\mathbf{x}_{\text{fake}}}[\log(1 - D_\lambda(\mathbf{x}_{\text{fake}}))]$ 

5:   Update  $s_\psi$  with denoising score matching loss:
        $\mathcal{L}_{\text{diffusion}} = \int_0^T w(t) \mathbb{E}_{\mathbf{x}_t | \mathbf{x}_{\text{fake}} \sim p_{\theta,t}(\mathbf{x}_t | \mathbf{x}_{\text{fake}})} \|s_\psi(\mathbf{x}_t, t) - \nabla_{\mathbf{x}_t} \log p_t(\mathbf{x}_t | \mathbf{x}_{\text{fake}})\|_2^2 dt$ 
6:   Calculate Uni-Instruct loss:  $\mathcal{L}_{\text{Uni}} = \text{Equation 3.5}$ 
7:   Calculate adversarial loss (non-saturating):  $\mathcal{L}_{\text{GAN}} = -\mathbb{E}_{\mathbf{x}_{\text{fake}}}[\log D_\lambda(\mathbf{x}_{\text{fake}})]$ 
8:   Update  $g_\theta$  with total loss:  $\mathcal{L}_{\text{total}} = \mathcal{L}_{\text{Uni}} + w_{\text{GAN}} \cdot \mathcal{L}_{\text{GAN}}$ 
9: end while
10: return  $g_\theta$ 
```

---

## E Details of 3D Experiments

**Experiment Settings** In this section, we elaborate on the implementation details of Uni-Instruct on text-to-3D generation. We re-implement the code base of ProlificDreamer [59] by adding an extra discriminator head to the output of the stable diffusion Unet’s encoder. We apply forward-KL and reverse-KL to Uni-Instruct and train the NeRF model. To further demonstrate the visual quality, we transform the NeRF to mesh with the three-stage refinement scheme proposed by ProlificDreamer: (1) Stage one, we use Uni-Instruct guidance to train the NeRF model for 300~400 epochs, based on the model’s performance on different text prompts. (2) Stage 2, we obtain the mesh representation from the NeRF model and use the SDS loss to fine-tune the object’s geometry appearance for 150 epochs. (3) Stage 3: We add more vivid texture to the object through further finetuning with Uni-Instruct guidance for an additional 150 epochs. Additionally, we enhance the object’s appearance with a human-aligned loss provided by a reward model.

**Performance Evaluations** Fig. 4 shows the objects produced by the mesh backbone. Uni-Instruct produces more diverse results compared to ProlificDreamer and DreamFusion. Fig. 5 demonstrates more objects trained with the NeRF backbone. Tab. 7 shows the numerical results. Our method slightly outperforms the baseline methods.

## F Limitaions

Training an additional discriminator to estimate the density ratio brings extra computational costs and may lead to unstable training. For instance, we found that the output of a 3D object trained with Uni-Instruct forward KL is more foggy than reverse KL, which doesn’t require an extra discriminator. Additionally, Uni-Instruct suffers from slow convergence: Training Uni-Instruct on both 2D distillation and text-to-3D tasks takes twice as long as training DMD and ProlificDreamer on their respective tasks. Moreover, Uni-Instruct may result in bad performance with an improper choice of  $f$ , as the gradient formula in Eq. 3.3 requires the fourth derivative of function  $f$ , which will add complexity

---

**Algorithm 2** Uni-Instruct for Text-to-3D Generation

---

**Input:** pre-trained DM  $s_{q_t}$ , generator  $g_\theta$ , fake score network  $s_\psi$ , discriminator  $D_\lambda$ , divergence  $f$ , GAN weight  $w_{\text{GAN}}$ , diffusion timesteps weighting  $w(t)$ .

- 1: **while** not converge **do**
  - 2:   Sample camera view  $c$  and random noises:  $\epsilon \sim \mathcal{N}(0, I)$
  - 3:   Render fake images from NeRF:  $\mathbf{x} = g(\theta, c)$
  - 4:   Sample real images and random noises:  $\mathbf{x}_{\text{real}} \sim p_{\text{data}}, \epsilon \sim \mathcal{N}(0, I)$
  - 5:   Update  $D_\lambda$  with discriminator loss:  $\mathcal{L}_D = -\mathbb{E}_{\mathbf{x}_{\text{real}}}[\log D_\lambda(\mathbf{x}_{\text{real}})] - \mathbb{E}_{\mathbf{x}_{\text{fake}}}[\log(1 - D_\lambda(\mathbf{x}_{\text{fake}}))]$
  - 6:   Compute diffusion guidance:  $\mathcal{L}_{\text{diffusion}} = \int_0^T w(t) \mathbb{E}_{\mathbf{x}_t | \mathbf{x} \sim p_{\theta, t}(\mathbf{x}_t | \mathbf{x})} \|s_{p_{\theta, t}}(\mathbf{x}_t) - s_{q_t}(\mathbf{x}_t)\|_2^2 dt$
  - 7:   Compute Uni-Instruct loss:  $\mathcal{L}_{\text{Uni}}$  (Equation 3.5)
  - 8:   Update  $\theta$  with  $\mathcal{L}_{\text{Uni}}$ .
  - 9: **end while**
  - 10: **return**  $g_\theta$
- 

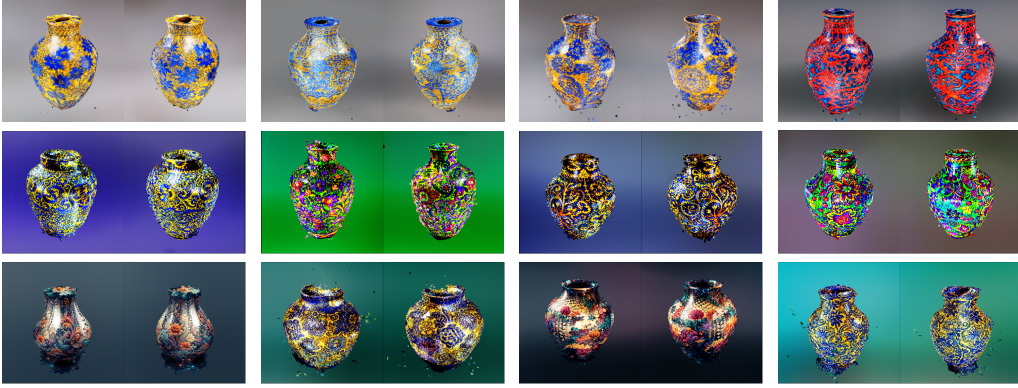

Figure 4: **Prompt:** A refined vase with artistic patterns. *From top to bottom* : ProlificDreamer, Uni-Instruct (Forward-KL), Uni-Instruct (Reverse-KL). Our vase demonstrates more diverse shapes as well as realistic patterns.

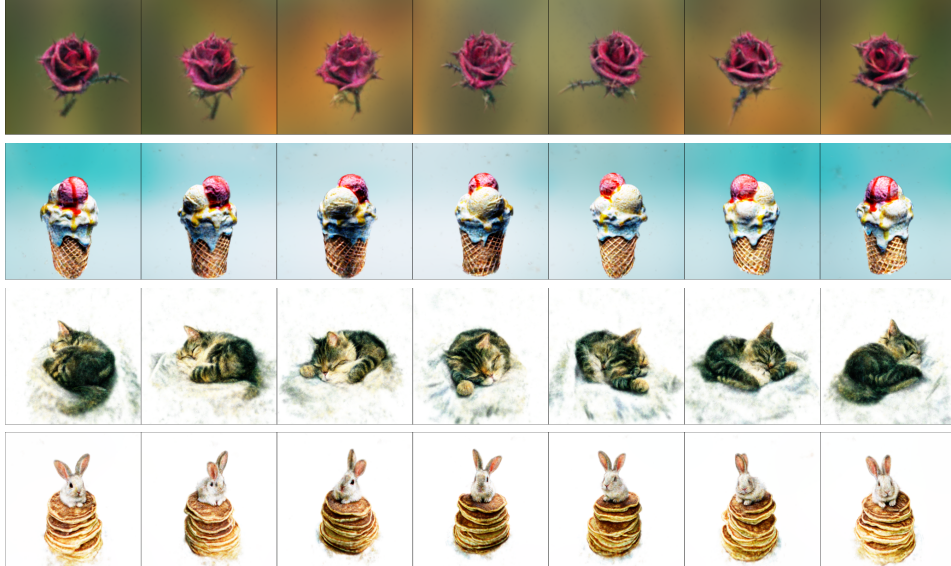

Figure 5: Results generated from our NeRF backbone. **Prompts (From top to bottom):** "A thorny rose.", "A high-quality photo of an ice cream sundae.", "A sleeping cat.", "A baby bunny sitting on top of a stack of pancakes."

Table 7: Comparison of different methods on Mesh and NeRF backbones. The prompt is: "A refined vase with artistic patterns."

| Method                           | NeRF          |              | Mesh          |              |
|----------------------------------|---------------|--------------|---------------|--------------|
|                                  | 3D-Aes Score↑ | 3D-CLIP↑     | 3D-Aes Score↑ | 3D-CLIP↑     |
| DreamFusion [44]                 | 1.07          | 27.79        | -             | -            |
| Fantasia3D [6]                   | -             | -            | 2.76          | 30.96        |
| ProlificDreamer [59]             | 2.15          | 30.97        | 4.91          | 31.92        |
| <b>Uni-Instruct (Forward-KL)</b> | 2.46          | 31.35        | 4.83          | 31.74        |
| <b>Uni-Instruct (Reverse-KL)</b> | <b>4.45</b>   | <b>33.94</b> | <b>7.54</b>   | <b>34.56</b> |

to the gradient formula. Therefore, Uni-Instruct is not as straightforward as some simpler existing methods like Diff-Instruct. We hope to develop more stable training techniques in future work.

## G Additional Results

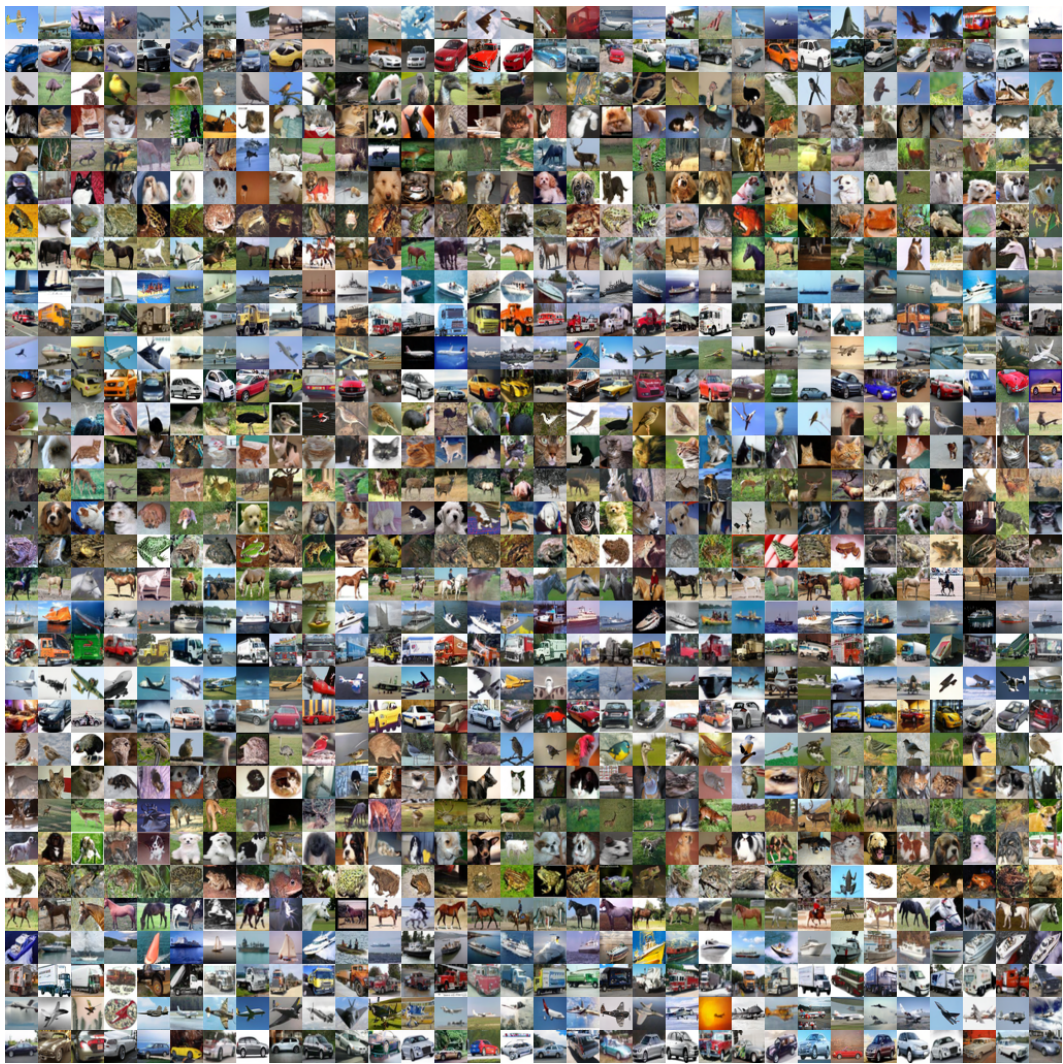

Figure 6: Forward-KL CIFAR10 conditional generation.



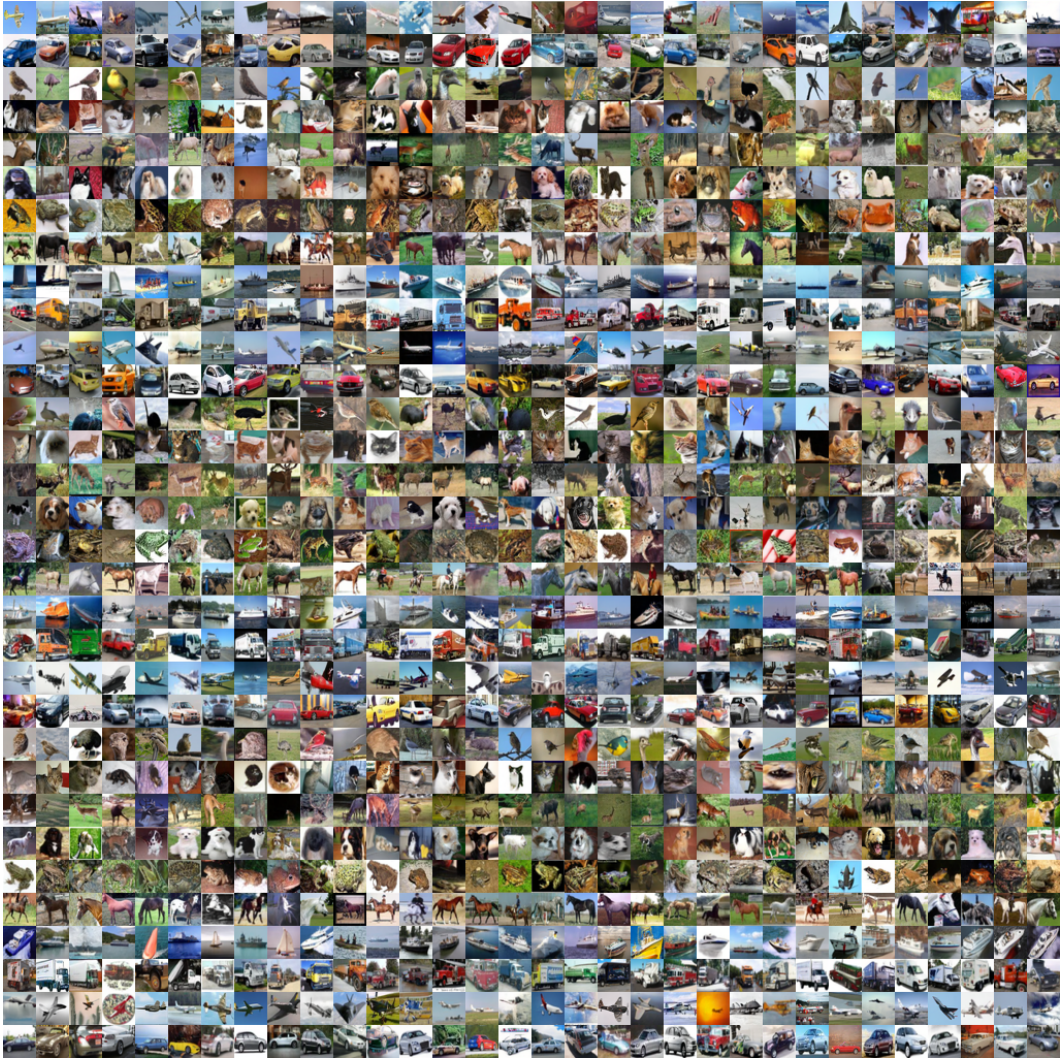

Figure 7: Jeffrey-KL CIFAR10 conditional generation.



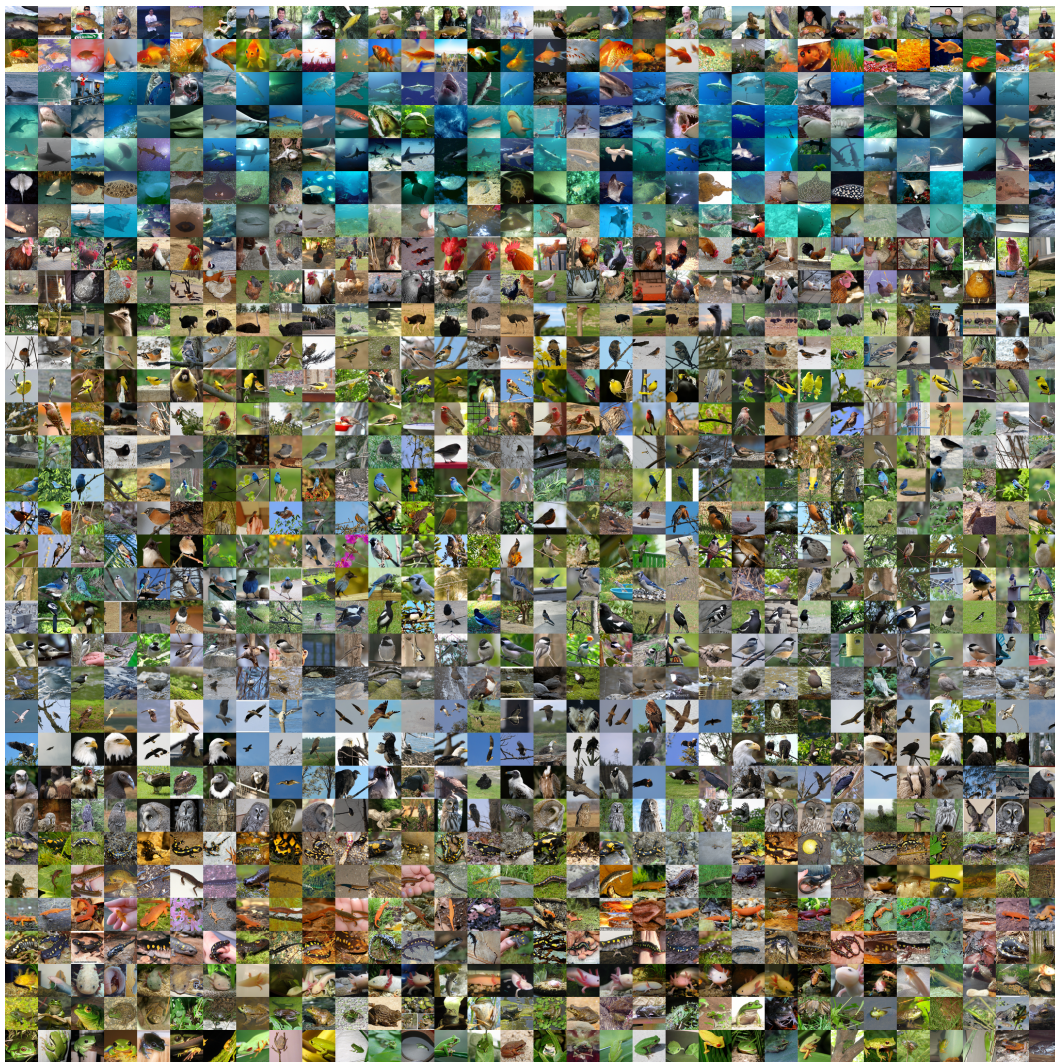

Figure 8: Forward-KL ImageNet64 conditional generation.



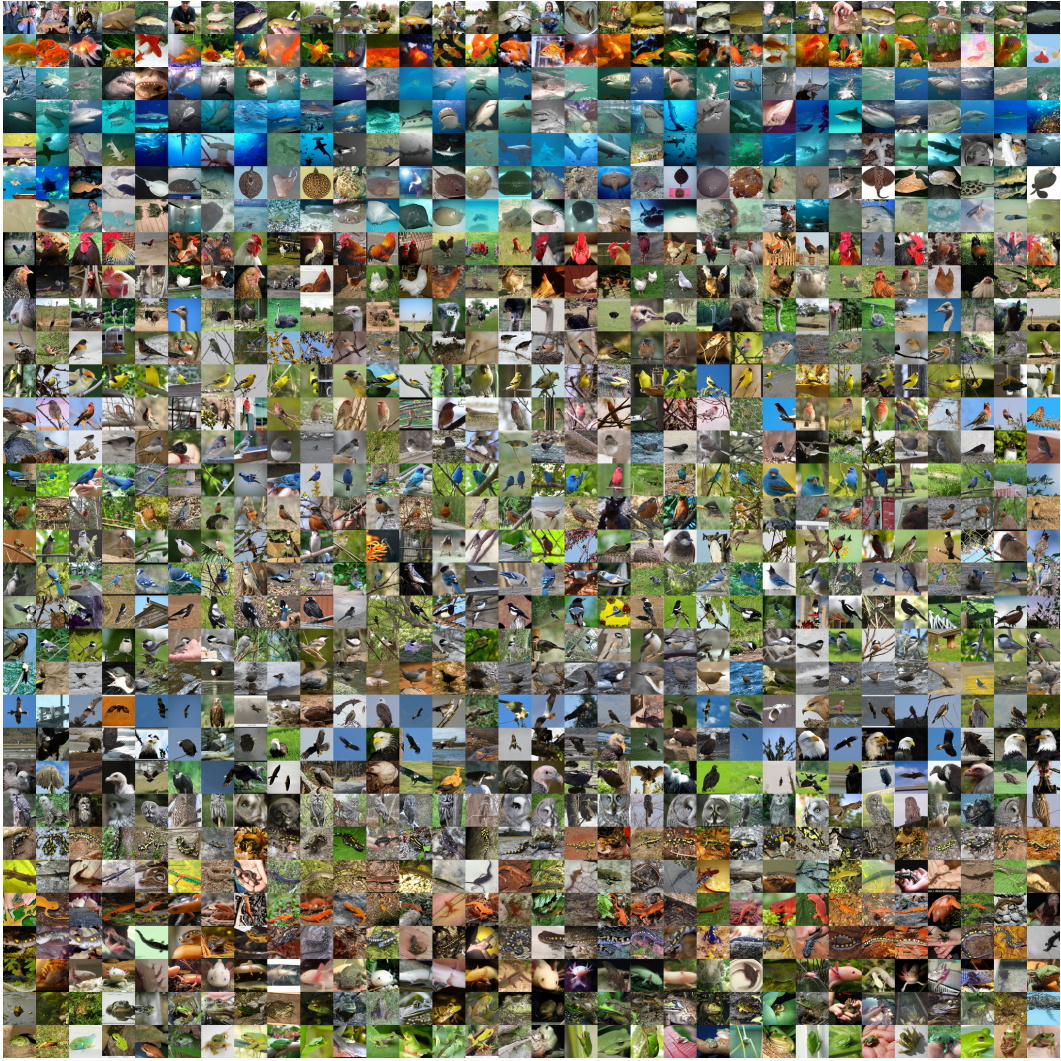

Figure 9: Forward-KL ImageNet64 conditional generation.

## NeurIPS Paper Checklist

### 1. Claims

Question: Do the main claims made in the abstract and introduction accurately reflect the paper's contributions and scope?

Answer: [\[Yes\]](#)

Justification: The claims match theoretical and experimental results.

Guidelines:

- The answer NA means that the abstract and introduction do not include the claims made in the paper.
- The abstract and/or introduction should clearly state the claims made, including the contributions made in the paper and important assumptions and limitations. A No or NA answer to this question will not be perceived well by the reviewers.
- The claims made should match theoretical and experimental results, and reflect how much the results can be expected to generalize to other settings.
- It is fine to include aspirational goals as motivation as long as it is clear that these goals are not attained by the paper.

### 2. Limitations

Question: Does the paper discuss the limitations of the work performed by the authors?

Answer: [\[Yes\]](#)

Justification: The limitations are discussed in the method section.

Guidelines:

- The answer NA means that the paper has no limitation while the answer No means that the paper has limitations, but those are not discussed in the paper.
- The authors are encouraged to create a separate "Limitations" section in their paper.
- The paper should point out any strong assumptions and how robust the results are to violations of these assumptions (e.g., independence assumptions, noiseless settings, model well-specification, asymptotic approximations only holding locally). The authors should reflect on how these assumptions might be violated in practice and what the implications would be.
- The authors should reflect on the scope of the claims made, e.g., if the approach was only tested on a few datasets or with a few runs. In general, empirical results often depend on implicit assumptions, which should be articulated.
- The authors should reflect on the factors that influence the performance of the approach. For example, a facial recognition algorithm may perform poorly when image resolution is low or images are taken in low lighting. Or a speech-to-text system might not be used reliably to provide closed captions for online lectures because it fails to handle technical jargon.
- The authors should discuss the computational efficiency of the proposed algorithms and how they scale with dataset size.
- If applicable, the authors should discuss possible limitations of their approach to address problems of privacy and fairness.
- While the authors might fear that complete honesty about limitations might be used by reviewers as grounds for rejection, a worse outcome might be that reviewers discover limitations that aren't acknowledged in the paper. The authors should use their best judgment and recognize that individual actions in favor of transparency play an important role in developing norms that preserve the integrity of the community. Reviewers will be specifically instructed to not penalize honesty concerning limitations.

### 3. Theory assumptions and proofs

Question: For each theoretical result, does the paper provide the full set of assumptions and a complete (and correct) proof?

Answer: [\[Yes\]](#)

Justification: All the proofs are elaborated in the appendix.

Guidelines:

- The answer NA means that the paper does not include theoretical results.
- All the theorems, formulas, and proofs in the paper should be numbered and cross-referenced.
- All assumptions should be clearly stated or referenced in the statement of any theorems.
- The proofs can either appear in the main paper or the supplemental material, but if they appear in the supplemental material, the authors are encouraged to provide a short proof sketch to provide intuition.
- Inversely, any informal proof provided in the core of the paper should be complemented by formal proofs provided in appendix or supplemental material.
- Theorems and Lemmas that the proof relies upon should be properly referenced.

#### 4. Experimental result reproducibility

Question: Does the paper fully disclose all the information needed to reproduce the main experimental results of the paper to the extent that it affects the main claims and/or conclusions of the paper (regardless of whether the code and data are provided or not)?

Answer: [\[Yes\]](#)

Justification: We fixed the random seed and can be reproduced.

Guidelines:

- The answer NA means that the paper does not include experiments.
- If the paper includes experiments, a No answer to this question will not be perceived well by the reviewers: Making the paper reproducible is important, regardless of whether the code and data are provided or not.
- If the contribution is a dataset and/or model, the authors should describe the steps taken to make their results reproducible or verifiable.
- Depending on the contribution, reproducibility can be accomplished in various ways. For example, if the contribution is a novel architecture, describing the architecture fully might suffice, or if the contribution is a specific model and empirical evaluation, it may be necessary to either make it possible for others to replicate the model with the same dataset, or provide access to the model. In general, releasing code and data is often one good way to accomplish this, but reproducibility can also be provided via detailed instructions for how to replicate the results, access to a hosted model (e.g., in the case of a large language model), releasing of a model checkpoint, or other means that are appropriate to the research performed.
- While NeurIPS does not require releasing code, the conference does require all submissions to provide some reasonable avenue for reproducibility, which may depend on the nature of the contribution. For example
  - (a) If the contribution is primarily a new algorithm, the paper should make it clear how to reproduce that algorithm.
  - (b) If the contribution is primarily a new model architecture, the paper should describe the architecture clearly and fully.
  - (c) If the contribution is a new model (e.g., a large language model), then there should either be a way to access this model for reproducing the results or a way to reproduce the model (e.g., with an open-source dataset or instructions for how to construct the dataset).
  - (d) We recognize that reproducibility may be tricky in some cases, in which case authors are welcome to describe the particular way they provide for reproducibility. In the case of closed-source models, it may be that access to the model is limited in some way (e.g., to registered users), but it should be possible for other researchers to have some path to reproducing or verifying the results.

#### 5. Open access to data and code

Question: Does the paper provide open access to the data and code, with sufficient instructions to faithfully reproduce the main experimental results, as described in supplemental material?



Answer: [Yes]

Justification: See the attached files. We will also open-source our code after the submission time.

Guidelines:

- The answer NA means that paper does not include experiments requiring code.
- Please see the NeurIPS code and data submission guidelines (<https://nips.cc/public/guides/CodeSubmissionPolicy>) for more details.
- While we encourage the release of code and data, we understand that this might not be possible, so “No” is an acceptable answer. Papers cannot be rejected simply for not including code, unless this is central to the contribution (e.g., for a new open-source benchmark).
- The instructions should contain the exact command and environment needed to run to reproduce the results. See the NeurIPS code and data submission guidelines (<https://nips.cc/public/guides/CodeSubmissionPolicy>) for more details.
- The authors should provide instructions on data access and preparation, including how to access the raw data, preprocessed data, intermediate data, and generated data, etc.
- The authors should provide scripts to reproduce all experimental results for the new proposed method and baselines. If only a subset of experiments are reproducible, they should state which ones are omitted from the script and why.
- At submission time, to preserve anonymity, the authors should release anonymized versions (if applicable).
- Providing as much information as possible in supplemental material (appended to the paper) is recommended, but including URLs to data and code is permitted.

## 6. Experimental setting/details

Question: Does the paper specify all the training and test details (e.g., data splits, hyper-parameters, how they were chosen, type of optimizer, etc.) necessary to understand the results?

Answer: [Yes]

Justification: See experiment section.

Guidelines:

- The answer NA means that the paper does not include experiments.
- The experimental setting should be presented in the core of the paper to a level of detail that is necessary to appreciate the results and make sense of them.
- The full details can be provided either with the code, in appendix, or as supplemental material.

## 7. Experiment statistical significance

Question: Does the paper report error bars suitably and correctly defined or other appropriate information about the statistical significance of the experiments?

Answer: [No]

Justification: Following common practice in the generative modeling literature, we do not report error bars in this paper because of the heavy computation overheads.

Guidelines:

- The answer NA means that the paper does not include experiments.
- The authors should answer "Yes" if the results are accompanied by error bars, confidence intervals, or statistical significance tests, at least for the experiments that support the main claims of the paper.
- The factors of variability that the error bars are capturing should be clearly stated (for example, train/test split, initialization, random drawing of some parameter, or overall run with given experimental conditions).
- The method for calculating the error bars should be explained (closed form formula, call to a library function, bootstrap, etc.)
- The assumptions made should be given (e.g., Normally distributed errors).

- It should be clear whether the error bar is the standard deviation or the standard error of the mean.
- It is OK to report 1-sigma error bars, but one should state it. The authors should preferably report a 2-sigma error bar than state that they have a 96% CI, if the hypothesis of Normality of errors is not verified.
- For asymmetric distributions, the authors should be careful not to show in tables or figures symmetric error bars that would yield results that are out of range (e.g. negative error rates).
- If error bars are reported in tables or plots, The authors should explain in the text how they were calculated and reference the corresponding figures or tables in the text.

## 8. Experiments compute resources

Question: For each experiment, does the paper provide sufficient information on the computer resources (type of compute workers, memory, time of execution) needed to reproduce the experiments?

Answer: [Yes]

Justification: In the appendix section, we explained the type of computational resource we used.

Guidelines:

- The answer NA means that the paper does not include experiments.
- The paper should indicate the type of compute workers CPU or GPU, internal cluster, or cloud provider, including relevant memory and storage.
- The paper should provide the amount of compute required for each of the individual experimental runs as well as estimate the total compute.
- The paper should disclose whether the full research project required more compute than the experiments reported in the paper (e.g., preliminary or failed experiments that didn't make it into the paper).

## 9. Code of ethics

Question: Does the research conducted in the paper conform, in every respect, with the NeurIPS Code of Ethics <https://neurips.cc/public/EthicsGuidelines>?

Answer: [Yes]

Justification: We followed the NeurIPS Code of Ethics in every respect.

Guidelines:

- The answer NA means that the authors have not reviewed the NeurIPS Code of Ethics.
- If the authors answer No, they should explain the special circumstances that require a deviation from the Code of Ethics.
- The authors should make sure to preserve anonymity (e.g., if there is a special consideration due to laws or regulations in their jurisdiction).

## 10. Broader impacts

Question: Does the paper discuss both potential positive societal impacts and negative societal impacts of the work performed?

Answer: [Yes]

Justification: See the conclusion part of the paper. We hope our method will inspire future work.

Guidelines:

- The answer NA means that there is no societal impact of the work performed.
- If the authors answer NA or No, they should explain why their work has no societal impact or why the paper does not address societal impact.
- Examples of negative societal impacts include potential malicious or unintended uses (e.g., disinformation, generating fake profiles, surveillance), fairness considerations (e.g., deployment of technologies that could make decisions that unfairly impact specific groups), privacy considerations, and security considerations.

- The conference expects that many papers will be foundational research and not tied to particular applications, let alone deployments. However, if there is a direct path to any negative applications, the authors should point it out. For example, it is legitimate to point out that an improvement in the quality of generative models could be used to generate deepfakes for disinformation. On the other hand, it is not needed to point out that a generic algorithm for optimizing neural networks could enable people to train models that generate Deepfakes faster.
- The authors should consider possible harms that could arise when the technology is being used as intended and functioning correctly, harms that could arise when the technology is being used as intended but gives incorrect results, and harms following from (intentional or unintentional) misuse of the technology.
- If there are negative societal impacts, the authors could also discuss possible mitigation strategies (e.g., gated release of models, providing defenses in addition to attacks, mechanisms for monitoring misuse, mechanisms to monitor how a system learns from feedback over time, improving the efficiency and accessibility of ML).

## 11. Safeguards

Question: Does the paper describe safeguards that have been put in place for responsible release of data or models that have a high risk for misuse (e.g., pretrained language models, image generators, or scraped datasets)?

Answer: [NA]

Justification: The paper poses no such risks.

Guidelines:

- The answer NA means that the paper poses no such risks.
- Released models that have a high risk for misuse or dual-use should be released with necessary safeguards to allow for controlled use of the model, for example by requiring that users adhere to usage guidelines or restrictions to access the model or implementing safety filters.
- Datasets that have been scraped from the Internet could pose safety risks. The authors should describe how they avoided releasing unsafe images.
- We recognize that providing effective safeguards is challenging, and many papers do not require this, but we encourage authors to take this into account and make a best faith effort.

## 12. Licenses for existing assets

Question: Are the creators or original owners of assets (e.g., code, data, models), used in the paper, properly credited and are the license and terms of use explicitly mentioned and properly respected?

Answer: [Yes]

Justification: We cite the papers and include CC-BY 4.0 license.

Guidelines:

- The answer NA means that the paper does not use existing assets.
- The authors should cite the original paper that produced the code package or dataset.
- The authors should state which version of the asset is used and, if possible, include a URL.
- The name of the license (e.g., CC-BY 4.0) should be included for each asset.
- For scraped data from a particular source (e.g., website), the copyright and terms of service of that source should be provided.
- If assets are released, the license, copyright information, and terms of use in the package should be provided. For popular datasets, [paperswithcode.com/datasets](https://paperswithcode.com/datasets) has curated licenses for some datasets. Their licensing guide can help determine the license of a dataset.
- For existing datasets that are re-packaged, both the original license and the license of the derived asset (if it has changed) should be provided.

955           • If this information is not available online, the authors are encouraged to reach out to  
956           the asset’s creators.

957 **13. New assets**

958       Question: Are new assets introduced in the paper well documented and is the documentation  
959       provided alongside the assets?

960       Answer: [\[Yes\]](#)

961       Justification: We provide new anonymized assets.

962       Guidelines:

963           • The answer NA means that the paper does not release new assets.

964           • Researchers should communicate the details of the dataset/code/model as part of their  
965           submissions via structured templates. This includes details about training, license,  
966           limitations, etc.

967           • The paper should discuss whether and how consent was obtained from people whose  
968           asset is used.

969           • At submission time, remember to anonymize your assets (if applicable). You can either  
970           create an anonymized URL or include an anonymized zip file.

971 **14. Crowdsourcing and research with human subjects**

972       Question: For crowdsourcing experiments and research with human subjects, does the paper  
973       include the full text of instructions given to participants and screenshots, if applicable, as  
974       well as details about compensation (if any)?

975       Answer: [\[NA\]](#)

976       Justification: This project does not involve human subjects.

977       Guidelines:

978           • The answer NA means that the paper does not involve crowdsourcing nor research with  
979           human subjects.

980           • Including this information in the supplemental material is fine, but if the main contribu-  
981           tion of the paper involves human subjects, then as much detail as possible should be  
982           included in the main paper.

983           • According to the NeurIPS Code of Ethics, workers involved in data collection, curation,  
984           or other labor should be paid at least the minimum wage in the country of the data  
985           collector.

986 **15. Institutional review board (IRB) approvals or equivalent for research with human**  
987 **subjects**

988       Question: Does the paper describe potential risks incurred by study participants, whether  
989       such risks were disclosed to the subjects, and whether Institutional Review Board (IRB)  
990       approvals (or an equivalent approval/review based on the requirements of your country or  
991       institution) were obtained?

992       Answer: [\[NA\]](#)

993       Justification: This project does not involve human subjects.

994       Guidelines:

995           • The answer NA means that the paper does not involve crowdsourcing nor research with  
996           human subjects.

997           • Depending on the country in which research is conducted, IRB approval (or equivalent)  
998           may be required for any human subjects research. If you obtained IRB approval, you  
999           should clearly state this in the paper.

1000           • We recognize that the procedures for this may vary significantly between institutions  
1001           and locations, and we expect authors to adhere to the NeurIPS Code of Ethics and the  
1002           guidelines for their institution.

1003           • For initial submissions, do not include any information that would break anonymity (if  
1004           applicable), such as the institution conducting the review.

1005 **16. Declaration of LLM usage**

1006 Question: Does the paper describe the usage of LLMs if it is an important, original, or  
1007 non-standard component of the core methods in this research? Note that if the LLM is used  
1008 only for writing, editing, or formatting purposes and does not impact the core methodology,  
1009 scientific rigorousness, or originality of the research, declaration is not required.

1010 Answer: [NA]

1011 Justification: The core method development in this research does not involve LLMs as any  
1012 important, original, or non-standard components.

1013 Guidelines:

- 1014 • The answer NA means that the core method development in this research does not  
1015 involve LLMs as any important, original, or non-standard components.
- 1016 • Please refer to our LLM policy (<https://neurips.cc/Conferences/2025/LLM>)  
1017 for what should or should not be described.
